# Supplementary material for: Uracil DNA glycosylase (UDG) activities in Bradyrhizobium diazoefficiens: characterization of a new class of UDG with broad substrate specificity
Source: PubMed Central journal article supplement — Nucleic Acids Res. 2017 Mar 28;45(10):5863–76. doi: 10.1093/nar/gkx209 (PMC5449639; doi:10.1093/nar/gkx209), 2017-03-28
Supplement: gkx209_Supp.pdf [file gkx209_Supp.pdf]

**Supplementary online material**

**Uracil DNA glycosylase (UDG) activities in *Bradyrhizobium diazoefficiens*, a G+C rich nitrogen fixing symbiont and structural and functional characterization of a new class of UDG, *BdiUng* having broad substrate specificity**

Ullas Valiya Chembazhi<sup>1,#</sup>, Vinod Vikas Patil<sup>2,3,#</sup>, Shivjee Sah<sup>1</sup>, Wayne Reeve<sup>4</sup>, Ravi P. Tiwari<sup>4</sup>, Euijeon Woo<sup>2,3\*</sup>, and Umesh Varshney<sup>1,4,5,\*</sup>

<sup>1</sup>Department of Microbiology and Cell Biology, Indian Institute of Science, Bangalore, 560012, India, <sup>2</sup>Functional Genomic Research Center, Korea Research Institute of Bioscience and Biotechnology, 125 Gwahak-Ro, Yuseon-Gu, Daejeon, 34141, Republic of Korea, <sup>3</sup>Department of Bio-Analytical Science, University of Science and Technology, Daejeon 34113, Republic of Korea, <sup>4</sup>Centre for Rhizobium Studies, School of Veterinary and Life Sciences, Murdoch University, Murdoch WA 6150, and <sup>5</sup>Jawaharlal Nehru Centre for Advanced Scientific Research, Bangalore, 560064, India

<sup>#</sup>Contributed equally to this work

<sup>\*</sup>Joint corresponding authors

### **Generation of *BdiUng* A59Y mutation its purification and activity assays**

PCR based quick-change mutagenesis was performed to generate A59Y mutation in *BdiUng*. Primer extension reactions were carried out taking 50 ng of template (pTrc*BdiUng*) and 10 pmol of the forward and reverse primers (Table S2) in a 20 µl reaction with Pfu DNA polymerase. The reaction was heated at 94 °C for 4 min followed by 18 cycles of heating for 1 min at 95 °C, 45 seconds at corresponding annealing temperature and 10 min at 70 °C. Final extension was also carried out at 70 °C for 10 min. An aliquot (8 µl) from the reaction was digested with 1 unit of DpnI (NEB) for 14 h in NEB cut smart buffer and transformed into *E. coli* TG1. Plasmids were isolated and restriction digested from colonies that were ampicillin resistant. The mutation was ascertained through sequencing. The mutant protein was purified from *E. coli* TG1Δ*Ung*::*cm* strain using Ni-NTA column chromatography as described for the wild type *BdiUng* and subsequently assayed for base excision activities as described.

### **Supplementary references:**

1. Saitou, N. and Nei, M. (1987) The neighbor-joining method: a new method for reconstructing phylogenetic trees. *Molecular biology and evolution*, **4**, 406-425.
2. Dopazo, J. (1994) Estimating errors and confidence intervals for branch lengths in phylogenetic trees by a bootstrap approach. *Journal of molecular evolution*, **38**, 300-304.
3. Rzhetsky, A. and Nei, M. (1992) A Simple Method for Estimating and Testing Minimum-Evolution Trees. *Molecular biology and evolution*, **9**, 945.
4. Nei, M. and Kumar, S. (2000) *Molecular Evolution and Phylogenetics*. Oxford University Press.
5. Kumar, S., Stecher, G. and Tamura, K. (2016) MEGA7: Molecular Evolutionary Genetics Analysis Version 7.0 for Bigger Datasets. *Molecular biology and evolution*, **33**, 1870-1874.

**Table S1:** List of strains and plasmids used.

| Strain/plasmid                                | Details                                                                                                                                                                                                                                                                                              | Reference                                                                                                                                                                                                 |
|-----------------------------------------------|------------------------------------------------------------------------------------------------------------------------------------------------------------------------------------------------------------------------------------------------------------------------------------------------------|-----------------------------------------------------------------------------------------------------------------------------------------------------------------------------------------------------------|
| <i>E. coli</i> CC102                          | F', <i>ara-600</i> , $\Delta(gpt-lac)5$ , $\lambda^+$ , <i>relA1</i> , <i>spoT1</i> , <i>thiE1</i> , F128-(used to screen for C to T or G to A mutation)                                                                                                                                             | Cupples and Miller(1989)                                                                                                                                                                                  |
| <i>E. coli</i> TG1                            | K-12 <i>supE thi-1</i> $\Delta(lac-proAB)$ $\Delta(mcrB-hsdSM)5$ , ( $r_K^- m_K^-$ )                                                                                                                                                                                                                 | Sambrook, J. et. and Fritsch                                                                                                                                                                              |
| <i>E. coli</i> MG1655 $\Delta ung::kan$       | MG1655 containing $\Delta ung::kan$ (kan cassette inserted through BamHI site of <i>ung</i> )                                                                                                                                                                                                        | Bharti, S.K. and Varshney U (2010)                                                                                                                                                                        |
| <i>E. coli</i> CC102 $\Delta ung::kan$        | <i>E. coli</i> CC102 strain containing $\Delta ung::kan$ from MG1655 $\Delta ung::kan$                                                                                                                                                                                                               | This study                                                                                                                                                                                                |
| <i>E. coli</i> TG1 $\Delta ung::Cm$           | <i>E. coli</i> TG1 containing $\Delta ung::Cm$                                                                                                                                                                                                                                                       | Lab stock                                                                                                                                                                                                 |
| <i>Bradyrhizobium diazoefficiens</i> USDA 110 | Strain available at Murdoch University, Murdoch, Australia.                                                                                                                                                                                                                                          | <a href="http://www.ncbi.nlm.nih.gov/pubmed/25685260">http://www.ncbi.nlm.nih.gov/pubmed/25685260</a> and <a href="http://www.nature.com/articles/srep16825">http://www.nature.com/articles/srep16825</a> |
| pTrc99c                                       | <i>E. coli</i> expression vector ( $Amp^r$ )                                                                                                                                                                                                                                                         | Amersham                                                                                                                                                                                                  |
| pTrcNdeIHis                                   | A pTrc99C derivative wherein the original NdeI site was mutated by digesting it with NdeI and filling in the ends with T4 DNA polymerase followed by self-ligation. Subsequently, NcoI-HindIII fragment is replaced by NcoI-HindIII fragment from pET14b so as to include a sequence for hexaHis tag | Lab stock                                                                                                                                                                                                 |
| pTrcBdiUng                                    | pTrc99c with <i>Bdiung</i> ORF cloned in its NdeI/HindIII sites                                                                                                                                                                                                                                      | This study                                                                                                                                                                                                |
| pTrcEcoUng                                    | pTrc99c harbouring <i>EcoUng</i> ORF under lac promoter                                                                                                                                                                                                                                              | Kumar, N. V. and Varshney, U.                                                                                                                                                                             |
| pTrcBdiUng A59Y                               | pTrcBdiUng with <i>BdiUngA59Y</i> mutation                                                                                                                                                                                                                                                           | This study                                                                                                                                                                                                |
| pTrcBll3023                                   | pTrcNdeIHis with <i>Bll3023</i> ORF cloned in NdeI/HindIII sites                                                                                                                                                                                                                                     | This study                                                                                                                                                                                                |
| pTrcBlr5068                                   | pTrcNdeIHis with <i>Blr5068</i> ORF cloned in NdeI/HindIII sites                                                                                                                                                                                                                                     | This study                                                                                                                                                                                                |
| pTrcBlr6661                                   | pTrcNdeIHis with <i>Blr6661</i> ORF cloned in NdeI/HindIII sites                                                                                                                                                                                                                                     | This study                                                                                                                                                                                                |

**Table S2:** List of DNA oligomers used.

| Oligomer             | Size | Sequence                               | Remarks                                                                                         |
|----------------------|------|----------------------------------------|-------------------------------------------------------------------------------------------------|
| ssU9                 | 24   | ctcaagtgUaggcatgcaagagct               | ssDNA with U at position 9                                                                      |
| GU9                  | 37   | ctcaagtgUaggcatgcttttgcgatgcctgcaactga | G:U pair in stem at position 9 of a stem loop structure                                         |
| HmU                  | 24   | ctcaagtg(HmU)aggcatgcaagagct           | ssDNA containing 5-Hydroxymethyl uracil at position 9                                           |
| ssX9                 | 24   | ctcaagtg(X)aggcatgcaagagct             | ssDNA containing xanthine at position 9                                                         |
| ssF9                 | 24   | ctcaagtgFaggcatgcaagagct               | ssDNA with abasic site at position 9 (A stable AP DNA mimic of ssU9)                            |
| ssU9-Compl-G         | 24   | cttgcctgcctgcaacttgagtga               | Complementary oligonucleotides used in annealing reactions                                      |
| Compl-T              | 26   | ggcacttcgcctttagcagccagtc              |                                                                                                 |
| Compl-G              | 26   | ggcacttcgcctgtagcagccagtc              |                                                                                                 |
| G-oligo              | 30   | cgatcatggagccacagagctcccgttacag        |                                                                                                 |
| I                    | 26   | gactggctgctac(I)aggcgaagtgcc           | Inosine at position 14                                                                          |
| Ecoung-up-Fp         | 18   | tggataacctgtaatcatg                    | Forward and reverse primers flanking <i>ung</i> gene used for knockout confirmation             |
| Ecoung-dn-Rp         | 18   | ctcgatgattccgctcag                     |                                                                                                 |
| <i>Bdiung</i> -Fp    | 25   | gcatttcatatgctcacagaattcg              | Forward and reverse primers with NdeI, HindIII sites respectively to amplify <i>blr0248</i> ORF |
| <i>Bdiung</i> -Rp    | 25   | gcccaaagcttcgggttgccggccg              |                                                                                                 |
| U1-hairpin           | 22   | ctagaggatcc Uttt ggatcct               | U at 1st position of tetraloop hairpin                                                          |
| U2-hairpin           | 22   | ctagaggatcc tUtt ggatcct               | U at 2nd position of tetraloop hairpin                                                          |
| U3-hairpin           | 22   | ctagaggatcc ttUt ggatcct               | U at 3rd position of tetraloop hairpin                                                          |
| U4-hairpin           | 22   | ctagaggatcc ttU ggatcct                | U at 4th position of tetraloop hairpin                                                          |
| <i>BdiUngA59Y</i> Fp | 25   | gccaggatccctaccagcacgagac              | Primers used for site directed mutagenesis                                                      |
| <i>BdiUngA59Y</i> Rp | 25   | gtctcgtgctggtagggatcctggc              |                                                                                                 |
| Bll3023 Fp           | 25   | tcgagtcatatgtacctcgtcacc               | Forward and reverse primers with NdeI, HindIII sites respectively to amplify <i>Bll3023</i> ORF |
| Bll3023 Rp           | 25   | gatgacaagcttgggtgaaaggcg               |                                                                                                 |
| Blr6661 Fp           | 26   | tgacctatgtcgtgacgctcatg                | Forward and reverse primers with NdeI, HindIII sites respectively to amplify <i>Blr6661</i> ORF |
| Blr6661 Rp           | 28   | ctcctaagcttgggtctatgggtgttg            |                                                                                                 |
| Blr5068 Fp           | 26   | gagggcatatgacactttgaggagt              | Forward and reverse primers with NdeI, HindIII sites respectively to amplify <i>Blr5068</i> ORF |
| Blr5068 Rp           | 25   | aaggccaagctgtcaagactagt                |                                                                                                 |
| TTUTT                | 5    | ttutt                                  | Used for determining minimum substrate required for <i>BdiUng</i>                               |
| TUTT                 | 4    | tutt                                   |                                                                                                 |
| TTUT                 | 4    | ttut                                   |                                                                                                 |
| UTT                  | 3    | utt                                    |                                                                                                 |

**Table S3:** Percentage (G+C) content of organisms in which homologues of *BdiUng* has been identified.

| <b>Organism</b>                      | <b>% (G+C) content</b> | <b>Characteristic</b> |
|--------------------------------------|------------------------|-----------------------|
| <i>Bradyrhizobium diazoefficiens</i> | 64.1                   | Nitrogen fixer        |
| <i>Frankia</i> sp. Eu11c             | 72.3                   | Nitrogen fixer        |
| <i>Streptacidiphilus rugosus</i>     | 71                     | Acidophile            |
| <i>Kitasatospora azatica</i>         | 71.6                   | Acidophile            |
| <i>Nitrosospira</i> sp. NpAV         | 53.14                  | Nitrite oxidizer      |
| <i>Intrasporangium calvum</i>        | 70.7                   | A type strain         |
| <i>Streptomyces xylophagus</i>       | 69.8                   | Xylanase producer     |
| <i>Janibacter</i> sp. HTCC2649       | 68.44                  | Marine                |
| <i>Chromobacterium haemolyticum</i>  | 62.84                  | Human pathogen        |

**Table S4:** Sequences considered for constructing evolutionary tree

| No. | Protein          | Secondary Accessions & Ids | Species                                                                                  |
|-----|------------------|----------------------------|------------------------------------------------------------------------------------------|
| 1   | UNG_ECOLI        | P12295                     | Escherichia coli (strain K12)                                                            |
| 2   | UNG_SHIDS        | Q32CT9                     | Shigella dysenteriae serotype 1 (strain Sd197)                                           |
| 3   | UNG_CITK8        | A8AD07                     | Citrobacter koseri (strain ATCC BAA-895 / CDC 4225-83 / SGSC4696)                        |
| 4   | V5CNW9_ENTCL     | V5CNW9                     | Enterobacter cloacae S611                                                                |
| 5   | D2TU36_CITRI     | D2TU36                     | Citrobacter rodentium (strain ICC168)                                                    |
| 6   | E3G7U3_ENTLS     | E3G7U3                     | Enterobacter lignolyticus (strain SCF1)                                                  |
| 7   | W1DYL0_KLEPN     | W1DYL0                     | Klebsiella pneumoniae IS46                                                               |
| 8   | UNG_KLEP7        | A6TCJ2                     | Klebsiella pneumoniae subsp. pneumoniae (strain ATCC 700721 / MGH 78578)                 |
| 9   | W1H494_KLEPN     | W1H494                     | Klebsiella pneumoniae ISC21                                                              |
| 10  | W1DPM6_KLEPN     | W1DPM6                     | Klebsiella pneumoniae IS43                                                               |
| 11  | W1HRH7_KLEPN     | W1HRH7                     | Klebsiella pneumoniae IS39                                                               |
| 12  | UNG_SALTY        | P67073                     | Salmonella typhimurium (strain LT2 / SGSC1412 / ATCC 700720)                             |
| 13  | UNG_SALAR        | A9MGV9                     | Salmonella arizonae (strain ATCC BAA-731 / CDC346-86 / RSK2980)                          |
| 14  | A0A090VYD8_ESCVU | A0A090VYD8                 | Escherichia vulneris NBRC 102420                                                         |
| 15  | A0A089PQ15_PLUGE | A0A089PQ15                 | Pluralibacter gergoviae                                                                  |
| 16  | UNG_ENT38        | A4WDE9                     | Enterobacter sp. (strain 638)                                                            |
| 17  | A0A0D7EHL0_RAOOR | A0A0D7EHL0                 | Raoultella ornithinolytica                                                               |
| 18  | A0A085I9K6_9ENTR | A0A085I9K6                 | Kluyvera ascorbata ATCC 33433                                                            |
| 19  | G5LMQ3_SALET     | G5LMQ3                     | Salmonella enterica subsp. enterica serovar Alachua str. R6-377                          |
| 20  | H5V6R8_ESCHE     | H5V6R8                     | Escherichia hermannii NBRC 105704                                                        |
| 21  | A0A0A2W1E1_BEABA | A0A0A2W1E1                 | Beauveria bassiana D1-5                                                                  |
| 22  | A0A089UDV1_9ENTR | A0A089UDV1                 | Cedecea neteri                                                                           |
| 23  | I2B6E0_SHIBC     | I2B6E0                     | Shimwellia blattae (strain ATCC 29907 / DSM 4481 / JCM 1650 / NBRC 105725 / CDC 9005-74) |
| 24  | A0A071LPK9_9ENTR | A0A071LPK9                 | Mangrovibacter sp. MFB070                                                                |
| 25  | E6WF59_PANSA     | E6WF59                     | Pantoea sp. (strain At-9b)                                                               |
| 26  | U3TZT6_9ENTR     | U3TZT6                     | Plautia stali symbiont                                                                   |
| 27  | A0A0Q4MGN7_9ENTR | A0A0Q4MGN7                 | Erwinia sp. Leaf53                                                                       |
| 28  | A0A0J9BFU5_9BACT | A0A0J9BFU5                 | bacteria symbiont BFo1 of Frankliniella occidentalis                                     |
| 29  | D8MVU8_ERWBE     | D8MVU8                     | Erwinia billingiae (strain Eb661)                                                        |
| 30  | A0A085JIK1_9ENTR | A0A085JIK1                 | Tatumella ptyseos ATCC 33301                                                             |
| 31  | A0A0A1B204_9ENTR | A0A0A1B204                 | Pantoea sp. PSNIH2                                                                       |
| 32  | A0A0L7SZ48_9ENTR | A0A0L7SZ48                 | Erwinia iniecta                                                                          |
| 33  | W0L5U5_9ENTR     | W0L5U5                     | Chania multitudinisentens RB-25                                                          |
| 34  | UNG_ERWT9        | B2VEC7                     | Erwinia tasmaniensis (strain DSM 17950 / CIP 109463 / Et1/99)                            |
| 35  | A0A0F7H788_SERFO | A0A0F7H788                 | Serratia fonticola                                                                       |

|    |                  |            |                                                                                        |
|----|------------------|------------|----------------------------------------------------------------------------------------|
| 36 | H3RG71_PANSE     | H3RG71     | <i>Pantoea stewartii</i> subsp. <i>stewartii</i> DC283                                 |
| 37 | A0A014N9E9_9ENTR | A0A014N9E9 | <i>Erwinia mallotivora</i>                                                             |
| 38 | A0A083ZVJ9_9ENTR | A0A083ZVJ9 | <i>Serratia</i> sp. DD3                                                                |
| 39 | L0MLK8_SERMA     | L0MLK8     | <i>Serratia marcescens</i> FGI94                                                       |
| 40 | V3V4K5_SERS3     | V3V4K5     | <i>Serratia</i> sp. (strain ATCC 39006)                                                |
| 41 | D4GKN2_PANAM     | D4GKN2     | <i>Pantoea ananatis</i> (strain LMG 20103)                                             |
| 42 | G7LSC0_9ENTR     | G7LSC0     | <i>Brenneria</i> sp. EniD312                                                           |
| 43 | W1IS03_9ENTR     | W1IS03     | <i>Xenorhabdus szentirmaii</i> DSM 16338                                               |
| 44 | A0A0M2KL85_9ENTR | A0A0M2KL85 | <i>Erwinia tracheiphila</i>                                                            |
| 45 | I3AM20_SERPL     | I3AM20     | <i>Serratia plymuthica</i> PRI-2C                                                      |
| 46 | UNG_PECAS        | Q6D208     | <i>Pectobacterium atrosepticum</i> (strain SCRI 1043 / ATCC BAA-672)                   |
| 47 | A0A0U5L6G4_9ENTR | A0A0U5L6G4 | <i>Erwinia gerundensis</i>                                                             |
| 48 | E0SBI5_DICD3     | E0SBI5     | <i>Dickeya dadantii</i> (strain 3937)                                                  |
| 49 | MUG_ECOLI        | P0A9H1     | <i>Escherichia coli</i> (strain K12)                                                   |
| 50 | MUG_SHIDS        | Q32BP9     | <i>Shigella dysenteriae</i> serotype 1 (strain Sd197)                                  |
| 51 | D2TRS0_CITRI     | D2TRS0     | <i>Citrobacter rodentium</i> (strain ICC168)                                           |
| 52 | W1G114_ECOLX     | W1G114     | <i>Escherichia coli</i> ISC11                                                          |
| 53 | MUG_CITK8        | A8APW0     | <i>Citrobacter koseri</i> (strain ATCC BAA-895 / CDC 4225-83 / SGSC4696)               |
| 54 | MUG_SALAR        | A9MPV1     | <i>Salmonella arizonae</i> (strain ATCC BAA-731 / CDC346-86 / RSK2980)                 |
| 55 | MUG_SALTY        | Q7CPR7     | <i>Salmonella typhimurium</i> (strain LT2 / SGSC1412 / ATCC 700720)                    |
| 56 | MUG_ENT38        | A4WEK3     | <i>Enterobacter</i> sp. (strain 638)                                                   |
| 57 | MUG_CROSS8       | A7MJU3     | <i>Cronobacter sakazakii</i> (strain ATCC BAA-894)                                     |
| 58 | A0A090V372_ESCVU | A0A090V372 | <i>Escherichia vulneris</i> NBRC 102420                                                |
| 59 | E3G2N1_ENTLS     | E3G2N1     | <i>Enterobacter lignolyticus</i> (strain SCF1)                                         |
| 60 | A0A0J5MK11_PLUGE | A0A0J5MK11 | <i>Pluralibacter gergoviae</i>                                                         |
| 61 | MUG_KLEP7        | A6TE50     | <i>Klebsiella pneumoniae</i> subsp. <i>pneumoniae</i> (strain ATCC 700721 / MGH 78578) |
| 62 | W1DXH6_KLEPN     | W1DXH6     | <i>Klebsiella pneumoniae</i> IS46                                                      |
| 63 | W1HTC0_KLEPN     | W1HTC0     | <i>Klebsiella pneumoniae</i> IS39                                                      |
| 64 | V5A8Z5_ENTCL     | V5A8Z5     | <i>Enterobacter cloacae</i> S611                                                       |
| 65 | H5V6S8_ESCHE     | H5V6S8     | <i>Escherichia hermannii</i> NBRC 105704                                               |
| 66 | A0A0D7EJY6_RAOOR | A0A0D7EJY6 | <i>Raoultella ornithinolytica</i>                                                      |
| 67 | A0A089UCX2_9ENTR | A0A089UCX2 | <i>Cedecea neteri</i>                                                                  |
| 68 | A0A085IA79_9ENTR | A0A085IA79 | <i>Kluyvera ascorbata</i> ATCC 33433                                                   |
| 69 | A0A014M110_9ENTR | A0A014M110 | <i>Erwinia mallotivora</i>                                                             |
| 70 | A0A0L7TFD6_9ENTR | A0A0L7TFD6 | <i>Erwinia iniecta</i>                                                                 |
| 71 | A0A0A1AVI2_9ENTR | A0A0A1AVI2 | <i>Pantoea</i> sp. PSNIH2                                                              |
| 72 | D8MX55_ERWBE     | D8MX55     | <i>Erwinia billingiae</i> (strain Eb661)                                               |

|     |                  |            |                                                                                                      |
|-----|------------------|------------|------------------------------------------------------------------------------------------------------|
| 73  | A0A097QYU6_HAFAL | A0A097QYU6 | Hafnia alvei FB1                                                                                     |
| 74  | I2B552_SHIBC     | I2B552     | Shimwellia blattae (strain ATCC 29907 / DSM 4481 / JCM 1650 / NBRC 105725 / CDC 9005-74)             |
| 75  | A0A0J8YRT2_9BACT | A0A0J8YRT2 | bacteria symbiont BFo1 of Frankliniella occidentalis                                                 |
| 76  | G7LRY8_9ENTR     | G7LRY8     | Brenneria sp. EniD312                                                                                |
| 77  | A0A0U5GHM7_9ENTR | A0A0U5GHM7 | Erwinia gerundensis                                                                                  |
| 78  | B2VL29_ERWT9     | B2VL29     | Erwinia tasmaniensis (strain DSM 17950 / CIP 109463 / Et1/99)                                        |
| 79  | MUG_SERP5        | A8GJV5     | Serratia proteamaculans (strain 568)                                                                 |
| 80  | MUG_PECAS        | Q6D9D7     | Pectobacterium atrosepticum (strain SCRI 1043 / ATCC BAA-672)                                        |
| 81  | D4GN66_PANAM     | D4GN66     | Pantoea ananatis (strain LMG 20103)                                                                  |
| 82  | H3RA23_PANSE     | H3RA23     | Pantoea stewartii subsp. stewartii DC283                                                             |
| 83  | E6WD71_PANSA     | E6WD71     | Pantoea sp. (strain At-9b)                                                                           |
| 84  | A0A0F7H902_SERFO | A0A0F7H902 | Serratia fonticola                                                                                   |
| 85  | I3AIH5_SERPL     | I3AIH5     | Serratia plymuthica PRI-2C                                                                           |
| 86  | A0A0G3CMJ9_9ENTR | A0A0G3CMJ9 | Pragia fontium                                                                                       |
| 87  | I0QNN3_9ENTR     | I0QNN3     | Serratia sp. M24T3                                                                                   |
| 88  | L0MJZ4_SERMA     | L0MJZ4     | Serratia marcescens FGI94                                                                            |
| 89  | A0A0T9L0T9_9ENTR | A0A0T9L0T9 | Yersinia nurmii                                                                                      |
| 90  | W0I2B2_9ENTR     | W0I2B2     | Sodalis praecaptivus                                                                                 |
| 91  | V3TWE1_SERS3     | V3TWE1     | Serratia sp. (strain ATCC 39006)                                                                     |
| 92  | H2IUG4_RAHAAC    | H2IUG4     | Rahnella aquatilis (strain ATCC 33071 / DSM 4594 / JCM 1683 / NBRC 105701 / NCIMB 13365 / CIP 78.65) |
| 93  | G8NW51_GRAMM     | G8NW51     | Granulicella mallensis (strain ATCC BAA-1857 / DSM 23137 / MP5ACTX8)                                 |
| 94  | A0A0Q8PLL6_9ACTN | A0A0Q8PLL6 | Kitasatospora sp. Root187                                                                            |
| 95  | A0A0F0HJP7_9ACTN | A0A0F0HJP7 | Streptomyces sp. NRRL F-4428                                                                         |
| 96  | D9VKL8_9ACTN     | D9VKL8     | Streptomyces sp. C                                                                                   |
| 97  | L8ELN0_STRRM     | L8ELN0     | Streptomyces rimosus subsp. rimosus ATCC 10970                                                       |
| 98  | A0A0M9ZRN1_9ACTN | A0A0M9ZRN1 | Streptomyces sp. AS58                                                                                |
| 99  | A4IGM6_XENTR     | A4IGM6     | Xenopus tropicalis                                                                                   |
| 100 | H3B891_LATCH     | H3B891     | Latimeria chalumnae                                                                                  |
| 101 | G1KKQ2_ANOCA     | G1KKQ2     | Anolis carolinensis                                                                                  |
| 102 | V8PA34_OPHHA     | V8PA34     | Ophiophagus hannah                                                                                   |
| 103 | H3CLQ6_TETNG     | H3CLQ6     | Tetraodon nigroviridis                                                                               |
| 104 | I3KSN2_ORENI     | I3KSN2     | Oreochromis niloticus                                                                                |
| 105 | H2VE25_TAKRU     | H2VE25     | Takifugu rubripes                                                                                    |
| 106 | A0A0P7UYP6_9TELE | A0A0P7UYP6 | Scleropages formosus                                                                                 |
| 107 | A0A0G2KZ26_DANRE | A0A0G2KZ26 | Danio rerio                                                                                          |



|     |                  |            |                                                          |
|-----|------------------|------------|----------------------------------------------------------|
| 108 | H0WN54_OTOGA     | H0WN54     | Otolemur garnettii                                       |
| 109 | H0VAS3_CAVPO     | H0VAS3     | Cavia porcellus                                          |
| 110 | G1U181_RABIT     | G1U181     | Oryctolagus cuniculus                                    |
| 111 | G1S7F9_NOMLE     | G1S7F9     | Nomascus leucogenys                                      |
| 112 | G1THF7_RABIT     | G1THF7     | Oryctolagus cuniculus                                    |
| 113 | SMUG1_HUMAN      | Q53HV7     | Homo sapiens                                             |
| 114 | L8Y2M5_TUPCH     | L8Y2M5     | Tupaia chinensis                                         |
| 115 | F7DGX4_HORSE     | F7DGX4     | Equus caballus                                           |
| 116 | H2Q638_PANTR     | H2Q638     | Pan troglodytes                                          |
| 117 | SMUG1_RAT        | Q811Q1     | Rattus norvegicus                                        |
| 118 | G7PHW5_MACFA     | G7PHW5     | Macaca fascicularis                                      |
| 119 | SMUG1_MOUSE      | Q6P5C5     | Mus musculus                                             |
| 120 | A0A096MT05_PAPAN | A0A096MT05 | Papio anubis                                             |
| 121 | A0A0D9QZG3_CHLSB | A0A0D9QZG3 | Chlorocebus sabaues                                      |
| 122 | F6PUI2_MACMU     | F6PUI2     | Macaca mulatta                                           |
| 123 | G3SPZ8_LOXAF     | G3SPZ8     | Loxodonta africana                                       |
| 124 | A0A087X7G5_POEFO | A0A087X7G5 | Poecilia formosa                                         |
| 125 | G1L1H7_AILME     | G1L1H7     | Ailuropoda melanoleuca                                   |
| 126 | M3ZJJ0_XIPMA     | M3ZJJ0     | Xiphophorus maculatus                                    |
| 127 | M3Y384_MUSPF     | M3Y384     | Mustela putorius furo                                    |
| 128 | G3QCU0_GORGO     | G3QCU0     | Gorilla gorilla gorilla                                  |
| 129 | I3M4F6 ICTTR     | I3M4F6     | Ictidomys tridecemlineatus                               |
| 130 | G3N660_GASAC     | G3N660     | Gasterosteus aculeatus                                   |
| 131 | F7I3E8_CALJA     | F7I3E8     | Callithrix jacchus                                       |
| 132 | S9WWW6_CAMFR     | S9WWW6     | Camelus ferus                                            |
| 133 | L5L7F0_PTEAL     | L5L7F0     | Pteropus alecto                                          |
| 134 | L5MAG6_MYODS     | L5MAG6     | Myotis davidii                                           |
| 135 | W5LR77_ASTMX     | W5LR77     | Astyanax mexicanus                                       |
| 136 | G1NTF2_MYOLU     | G1NTF2     | Myotis lucifugus                                         |
| 137 | A0A0F8ADX5_LARCR | A0A0F8ADX5 | Larimichthys crocea                                      |
| 138 | S7N0S2_MYOBR     | S7N0S2     | Myotis brandtii                                          |
| 139 | H2MKL2_ORYLA     | H2MKL2     | Oryzias latipes                                          |
| 140 | I3LJI9_PIG       | I3LJI9     | Sus scrofa                                               |
| 141 | G3IGK5_CRIGR     | G3IGK5     | Cricetulus griseus                                       |
| 142 | SMUG1_BOVIN      | Q59I47     | Bos taurus                                               |
| 143 | G3WEA4_SARHA     | G3WEA4     | Sarcophilus harrisii                                     |
| 144 | F1Q3F6_CANLF     | F1Q3F6     | Canis lupus familiaris                                   |
| 145 | F1Q241_CANLF     | F1Q241     | Canis lupus familiaris                                   |
| 146 | M3WCS1_FELCA     | M3WCS1     | Felis catus                                              |
| 147 | Q5SKC5_THET8     | Q5SKC5     | Thermus thermophilus (strain HB8 / ATCC 27634 / DSM 579) |
| 148 | F2NQC7_MARHT     | F2NQC7     | Marinithermus hydrothermalis (strain DSM                 |

|     |                  |            |                                                                                  |
|-----|------------------|------------|----------------------------------------------------------------------------------|
|     |                  |            | 14884 / JCM 11576 / T1)                                                          |
| 149 | D7BHW7_MEISD     | D7BHW7     | Meiothermus silvanus (strain ATCC 700542 / DSM 9946 / VI-R2)                     |
| 150 | E4U889_OCEP5     | E4U889     | Oceanithermus profundus (strain DSM 14977 / NBRC 100410 / VKM B-2274 / 506)      |
| 151 | D3PTB3_MEIRD     | D3PTB3     | Meiothermus ruber (strain ATCC 35948 / DSM 1279 / VKM B-1258 / 21)               |
| 152 | G9PXF0_9BACT     | G9PXF0     | Synergistes sp. 3_1_syn1                                                         |
| 153 | A8F661_PSELT     | A8F661     | Pseudothermotoga lettingae (strain ATCC BAA-301 / DSM 14385 / NBRC 107922 / TMO) |
| 154 | E8U9Y5_DEIML     | E8U9Y5     | Deinococcus maricopensis (strain DSM 21211 / LMG 22137 / NRRL B-23946 / LB-34)   |
| 155 | D7CWJ9_TRURR     | D7CWJ9     | Truepera radiovictrix (strain DSM 17093 / CIP 108686 / LMG 22925 / RQ-24)        |
| 156 | A6LJD3_THEM4     | A6LJD3     | Thermosipho melanesiensis (strain DSM 12029 / CIP 104789 / BI429)                |
| 157 | A0A124FHE1_9BACT | A0A124FHE1 | Acetothermia bacterium 64_32                                                     |
| 158 | A0A073IQ13_9BACT | A0A073IQ13 | Synergistes jonesii                                                              |
| 159 | F7YUP4_9THEM     | F7YUP4     | Pseudothermotoga thermarum DSM 5069                                              |
| 160 | I4BVU8_ANAMD     | I4BVU8     | Anaerobaculum mobile (strain ATCC BAA-54 / DSM 13181 / NGA)                      |
| 161 | A0A0G2ZB04_9BACT | A0A0G2ZB04 | Kosmotoga pacifica                                                               |
| 162 | A0A101FM96_9BACT | A0A101FM96 | Synergistales bacterium 54_24                                                    |
| 163 | A7HJD1_FERNB     | A7HJD1     | Fervidobacterium nodosum (strain ATCC 35602 / DSM 5306 / Rt17-B1)                |
| 164 | D2Z3F4_9BACT     | D2Z3F4     | Dethiosulfovibrio peptidovorans DSM 11002                                        |
| 165 | C5CIT9_KOSOT     | C5CIT9     | Kosmotoga olearia (strain TBF 19.5.1)                                            |
| 166 | A0A101IYY8_9BACT | A0A101IYY8 | Synergistales bacterium 54_9                                                     |
| 167 | D1BA65_THEAS     | D1BA65     | Thermanaerovibrio acidaminovorans (strain ATCC 49978 / DSM 6589 / Su883)         |
| 168 | A0A101EEF6_9BACT | A0A101EEF6 | bacterium 42_11                                                                  |
| 169 | Q1IY33_DEIGD     | Q1IY33     | Deinococcus geothermalis (strain DSM 11300)                                      |
| 170 | Q31K46_SYNE7     | Q31K46     | Synechococcus elongatus (strain PCC 7942)                                        |
| 171 | A0A098TNB4_9CHRO | A0A098TNB4 | Neosynechococcus sphagnicola sy1                                                 |
| 172 | D5EEM5_AMICL     | D5EEM5     | Aminobacterium colombiense (strain DSM 12261 / ALA-1)                            |
| 173 | I2F485_9BACT     | I2F485     | Mesotoga prima MesG1.Ag.4.2                                                      |
| 174 | K9SMC9_9CYAN     | K9SMC9     | Pseudanabaena sp. PCC 7367                                                       |
| 175 | E3D056_9BACT     | E3D056     | Aminomonas paucivorans DSM 12260                                                 |
| 176 | D1Y4R2_9BACT     | D1Y4R2     | Pyramidobacter piscolens W5455                                                   |
| 177 | U5QJR1_9CYAN     | U5QJR1     | Gloeobacter kilaeuensis JS1                                                      |
| 178 | K9ZWH2_DEIPD     | K9ZWH2     | Deinococcus peraridilitoris (strain DSM 19664 / LMG 22246 / CIP 109416 / KR-200) |
| 179 | H0UK71_9BACT     | H0UK71     | Jonquetella anthropi DSM 22815                                                   |

|     |                  |            |                                                                                                                                 |
|-----|------------------|------------|---------------------------------------------------------------------------------------------------------------------------------|
| 180 | A0A124G0Z9_9BACT | A0A124G0Z9 | Synergistales bacterium 58_81                                                                                                   |
| 181 | A0A101HYT4_9BACT | A0A101HYT4 | candidate division TA06 bacterium 34_109                                                                                        |
| 182 | A0A0C1Y5L3_9CYAN | A0A0C1Y5L3 | Lyngbya confervoides BDU141951                                                                                                  |
| 183 | A0A101HQ32_9BACT | A0A101HQ32 | Mesotoga prima                                                                                                                  |
| 184 | Q8DHJ3_THEEB     | Q8DHJ3     | Thermosynechococcus elongatus (strain BP-1)                                                                                     |
| 185 | K9WJ37_9CYAN     | K9WJ37     | Microcoleus sp. PCC 7113                                                                                                        |
| 186 | A0A081C383_9BACT | A0A081C383 | bacterium UASB270                                                                                                               |
| 187 | F0RKU2_DEIPM     | F0RKU2     | Deinococcus proteolyticus (strain ATCC 35074 / DSM 20540 / JCM 6276 / NBRC 101906 / NCIMB 13154 / VKM Ac-1939 / CCM 2703 / MRP) |
| 188 | F4XUN6_9CYAN     | F4XUN6     | Moorea producens 3L                                                                                                             |
| 189 | B8HRZ5_CYAP4     | B8HRZ5     | Cyanotheca sp. (strain PCC 7425 / ATCC 29141)                                                                                   |
| 190 | Q7NHX7_GLOVI     | Q7NHX7     | Gloeobacter violaceus (strain PCC 7421)                                                                                         |
| 191 | K9SC25_9CYAN     | K9SC25     | Geitlerinema sp. PCC 7407                                                                                                       |
| 192 | A0A073CM55_PLAAG | A0A073CM55 | Planktothrix agardhii NIVA-CYA 126/8                                                                                            |
| 193 | K9P5R0_CYAGP     | K9P5R0     | Cyanobium gracile (strain ATCC 27147 / PCC 6307)                                                                                |
| 194 | G7VA85_THELD     | G7VA85     | Thermovirga lienii (strain ATCC BAA-1197 / DSM 17291 / Cas60314)                                                                |
| 195 | L8N552_9CYAN     | L8N552     | Pseudanabaena biceps PCC 7429                                                                                                   |
| 196 | A0A101EU31_9THEM | A0A101EU31 | Thermotoga sp. 50_1627                                                                                                          |
| 197 | Q5SJ65_THET8     | Q5SJ65     | Thermus thermophilus (strain HB8 / ATCC 27634 / DSM 579)                                                                        |
| 198 | F2NKD5_MARHT     | F2NKD5     | Marinithermus hydrothermalis (strain DSM 14884 / JCM 11576 / T1)                                                                |
| 199 | D3PN59_MEIRD     | D3PN59     | Meiothermus ruber (strain ATCC 35948 / DSM 1279 / VKM B-1258 / 21)                                                              |
| 200 | E4U9L6_OCEP5     | E4U9L6     | Oceanithermus profundus (strain DSM 14977 / NBRC 100410 / VKM B-2274 / 506)                                                     |
| 201 | D7BEP3_MEISD     | D7BEP3     | Meiothermus silvanus (strain ATCC 700542 / DSM 9946 / VI-R2)                                                                    |
| 202 | L0A585_DEIPD     | L0A585     | Deinococcus peraridilitoris (strain DSM 19664 / LMG 22246 / CIP 109416 / KR-200)                                                |
| 203 | A0A0P6XLM9_9CHLR | A0A0P6XLM9 | Levilinea saccharolytica                                                                                                        |
| 204 | D7CQJ9_TRURR     | D7CQJ9     | Truepera radiovictrix (strain DSM 17093 / CIP 108686 / LMG 22925 / RQ-24)                                                       |
| 205 | Q1IRD4_KORVE     | Q1IRD4     | Koribacter versatilis (strain Ellin345)                                                                                         |
| 206 | A0A0P6XV96_9CHLR | A0A0P6XV96 | Ornatilinea apprima                                                                                                             |
| 207 | A0A0P6WNG6_9CHLR | A0A0P6WNG6 | Leptolinea tardivitalis                                                                                                         |
| 208 | C1F2C9_ACIC5     | C1F2C9     | Acidobacterium capsulatum (strain ATCC 51196 / DSM 11244 / JCM 7670 / NBRC 15755 / NCIMB 13165 / 161)                           |
| 209 | A0A101H4T6_9CHLR | A0A101H4T6 | Anaerolineae bacterium 49_20                                                                                                    |
| 210 | G8NT74_GRAMM     | G8NT74     | Granulicella mallensis (strain ATCC BAA-                                                                                        |

|     |                  |            |                                                                              |
|-----|------------------|------------|------------------------------------------------------------------------------|
|     |                  |            | 1857 / DSM 23137 / MP5ACTX8)                                                 |
| 211 | Q091T5_STIAD     | Q091T5     | Stigmatella aurantiaca (strain DW4/3-1)                                      |
| 212 | E8WW97_GRATM     | E8WW97     | Granulicella tundricola (strain ATCC BAA-1859 / DSM 23138 / MP5ACTX9)        |
| 213 | A0A085WRF4_9DELT | A0A085WRF4 | Hyalangium minutum                                                           |
| 214 | A0A0C1RIV5_9ACTN | A0A0C1RIV5 | marine actinobacterium MedAcidi-G2A                                          |
| 215 | A0A0C1UUF1_9ACTN | A0A0C1UUF1 | marine actinobacterium MedAcidi-G1                                           |
| 216 | F8I6V1_SULAT     | F8I6V1     | Sulfobacillus acidophilus (strain TPY)                                       |
| 217 | A9GFE5_SORC5     | A9GFE5     | Sorangium cellulosum (strain So ce56)                                        |
| 218 | Q2IFN8_ANADE     | Q2IFN8     | Anaeromyxobacter dehalogenans (strain 2CP-C)                                 |
| 219 | A0A0N8GM42_9CHLR | A0A0N8GM42 | Bellilinea caldifistulae                                                     |
| 220 | E8V8B5_TERSS     | E8V8B5     | Terriglobus saanensis (strain ATCC BAA-1853 / DSM 23119 / SP1PR4)            |
| 221 | H0EAB6_9ACTN     | H0EAB6     | Patulibacter medicamentivorans                                               |
| 222 | Q1D6E4_MYXXD     | Q1D6E4     | Myxococcus xanthus (strain DK 1622)                                          |
| 223 | A0A0C1RIT9_9ACTN | A0A0C1RIT9 | marine actinobacterium MedAcidi-G2B                                          |
| 224 | H8MFC3_CORCM     | H8MFC3     | Coralloccoccus coralloides (strain ATCC 25202 / DSM 2259 / NBRC 100086 / M2) |
| 225 | Q0S418_RHOJR     | Q0S418     | Rhodococcus jostii (strain RHA1)                                             |
| 226 | B3DVE5_METI4     | B3DVE5     | Methylacidiphilum inferorum (isolate V4)                                     |
| 227 | A0A0R2XDU5_9BACT | A0A0R2XDU5 | Verrucomicrobia subdivision 6 bacterium BACL9 MAG-120924-bin69               |
| 228 | A0A0K2SIW3_9FIRM | A0A0K2SIW3 | Limnochorda pilosa                                                           |
| 229 | G2LFM3_CHLTF     | G2LFM3     | Chloracidobacterium thermophilum (strain B)                                  |
| 230 | M5AIS6_9ACTN     | M5AIS6     | Ilumatobacter coccineus YM16-304                                             |
| 231 | Q01X21_SOLUE     | Q01X21     | Solibacter usitatus (strain Ellin6076)                                       |
| 232 | A0A0G2ZPH4_9DELT | A0A0G2ZPH4 | Archangium gephyra                                                           |
| 233 | W6K3D0_9MICO     | W6K3D0     | Tetrasphaera australiensis Ben110                                            |
| 234 | Q67MX9_SYMTH     | Q67MX9     | Symbiobacterium thermophilum (strain T / IAM 14863)                          |
| 235 | A0A077MCB3_9MICO | A0A077MCB3 | Tetrasphaera jenkinsii Ben 74                                                |
| 236 | E8N6F1_ANATU     | E8N6F1     | Anaerolinea thermophila (strain DSM 14523 / JCM 11388 / NBRC 100420 / UNI-1) |
| 237 | H5XAX7_9PSEU     | H5XAX7     | Saccharomonospora marina XMU15                                               |
| 238 | R4L555_9ACTN     | R4L555     | Actinoplanes sp. N902-109                                                    |
| 239 | Q1ARW9_RUBXD     | Q1ARW9     | Rubrobacter xylanophilus (strain DSM 9941 / NBRC 16129)                      |
| 240 | A0A0S7BFS6_9CHLR | A0A0S7BFS6 | Longilinea arvoryzae                                                         |
| 241 | G2G6Q2_9ACTN     | G2G6Q2     | Streptomyces zinciresistens K42                                              |
| 242 | A0A060HT19_9ARCH | A0A060HT19 | Nitrososphaera viennensis EN76                                               |
| 243 | A0A0P6XX76_9CHLR | A0A0P6XX76 | Thermanaerotherix daxensis                                                   |
| 244 | A0A0K1Q7U9_9DELT | A0A0K1Q7U9 | Labilithrix luteola                                                          |
| 245 | D9XQ44_9ACTN     | D9XQ44     | Streptomyces griseoflavus Tu4000                                             |

|     |                  |                             |                                                                                      |
|-----|------------------|-----------------------------|--------------------------------------------------------------------------------------|
| 246 | S9Q4Y3_9DELT     | S9Q4Y3                      | Cystobacter fuscus DSM 2262                                                          |
| 247 | E3J5Z2_FRASU     | E3J5Z2                      | Frankia sp. (strain Eu11c)                                                           |
| 248 | SrUDG            | WP_013427486<br>(pubmed ID) | Streptacidiphilus rugosus                                                            |
| 249 | A0A0C3NQE5_9PROT | A0A0C3NQE5                  | Nitrospira sp. NpAV                                                                  |
| 250 | KaUDG            | WP_035839389<br>(pubmed ID) | Kitasatospora azatica                                                                |
| 251 | Q89XR0_BRADU     | Q89XR0                      | Bradyrhizobium diazoefficiens (strain JCM 10833 / IAM 13628 / NBRC 14792 / USDA 110) |

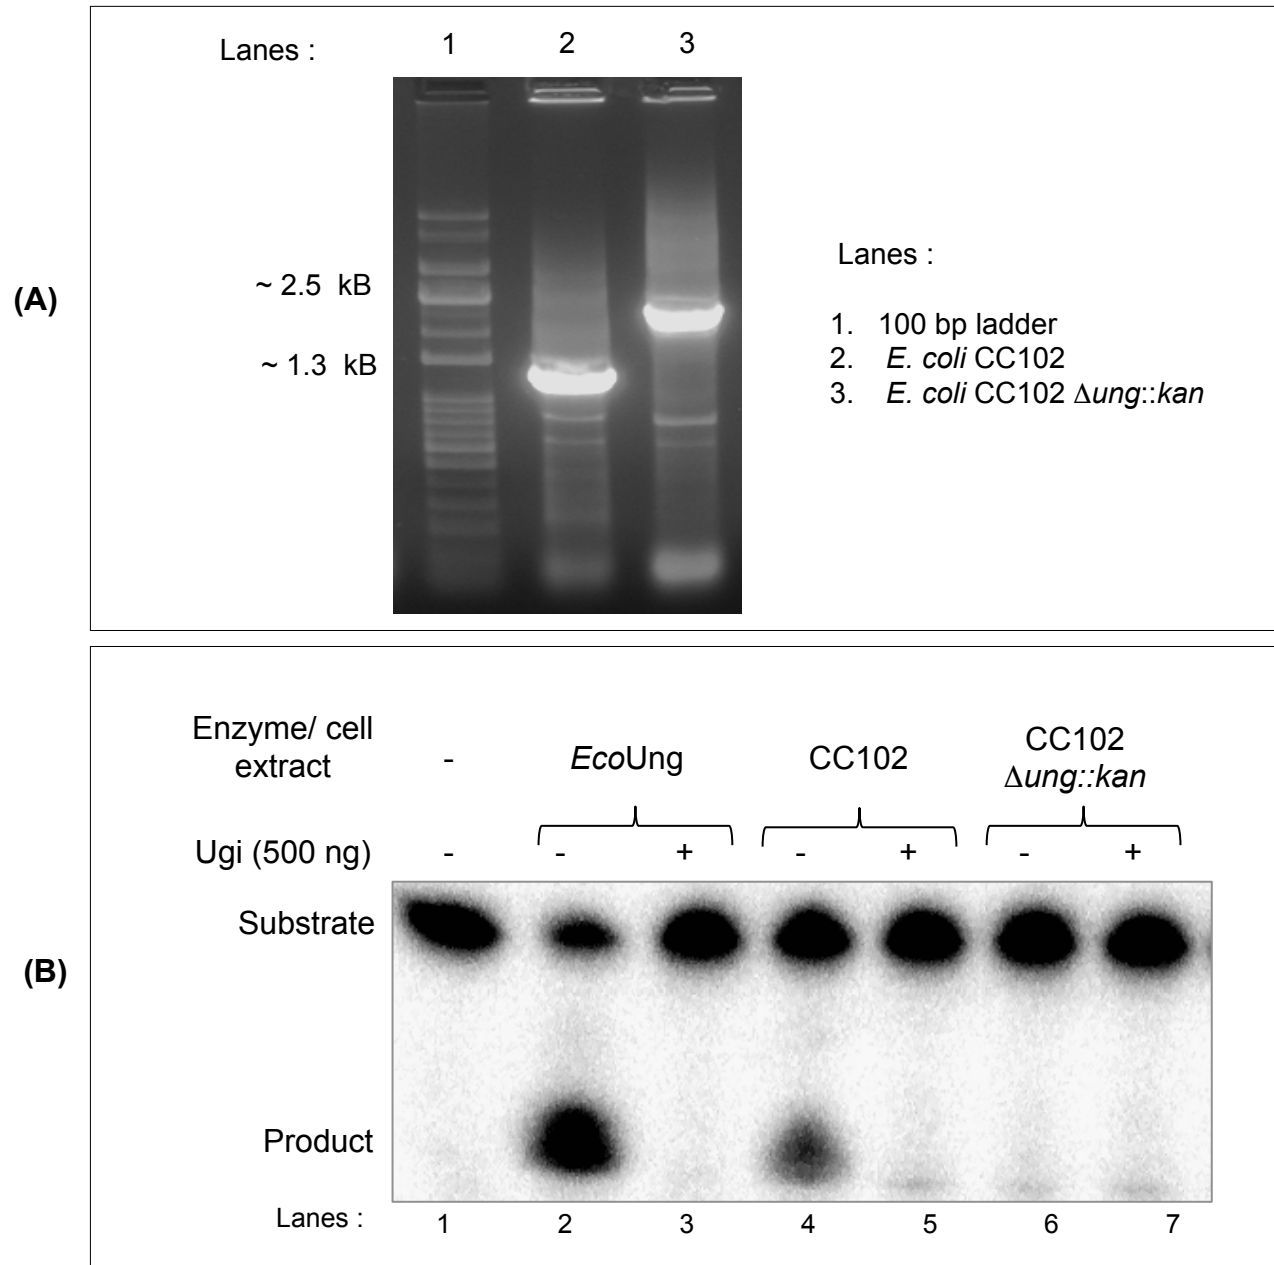

**Figure S1:** *E. coli* CC102 $\Delta ung::kan$  knockout confirmation. **(A)** PCR amplification of *ung* locus (lane 2) and  $\Delta ung::kan$  (lane 3) using EcoUng-up-Fp and EcoUng-dn-Rp primers resolved on 1% agarose gel adjacent to a 100 bp ladder (lane 1). **(B)** Uracil excision assay using a ssU9 substrate with cell free extracts (1  $\mu$ g) confirming the Ung<sup>-</sup> phenotype.

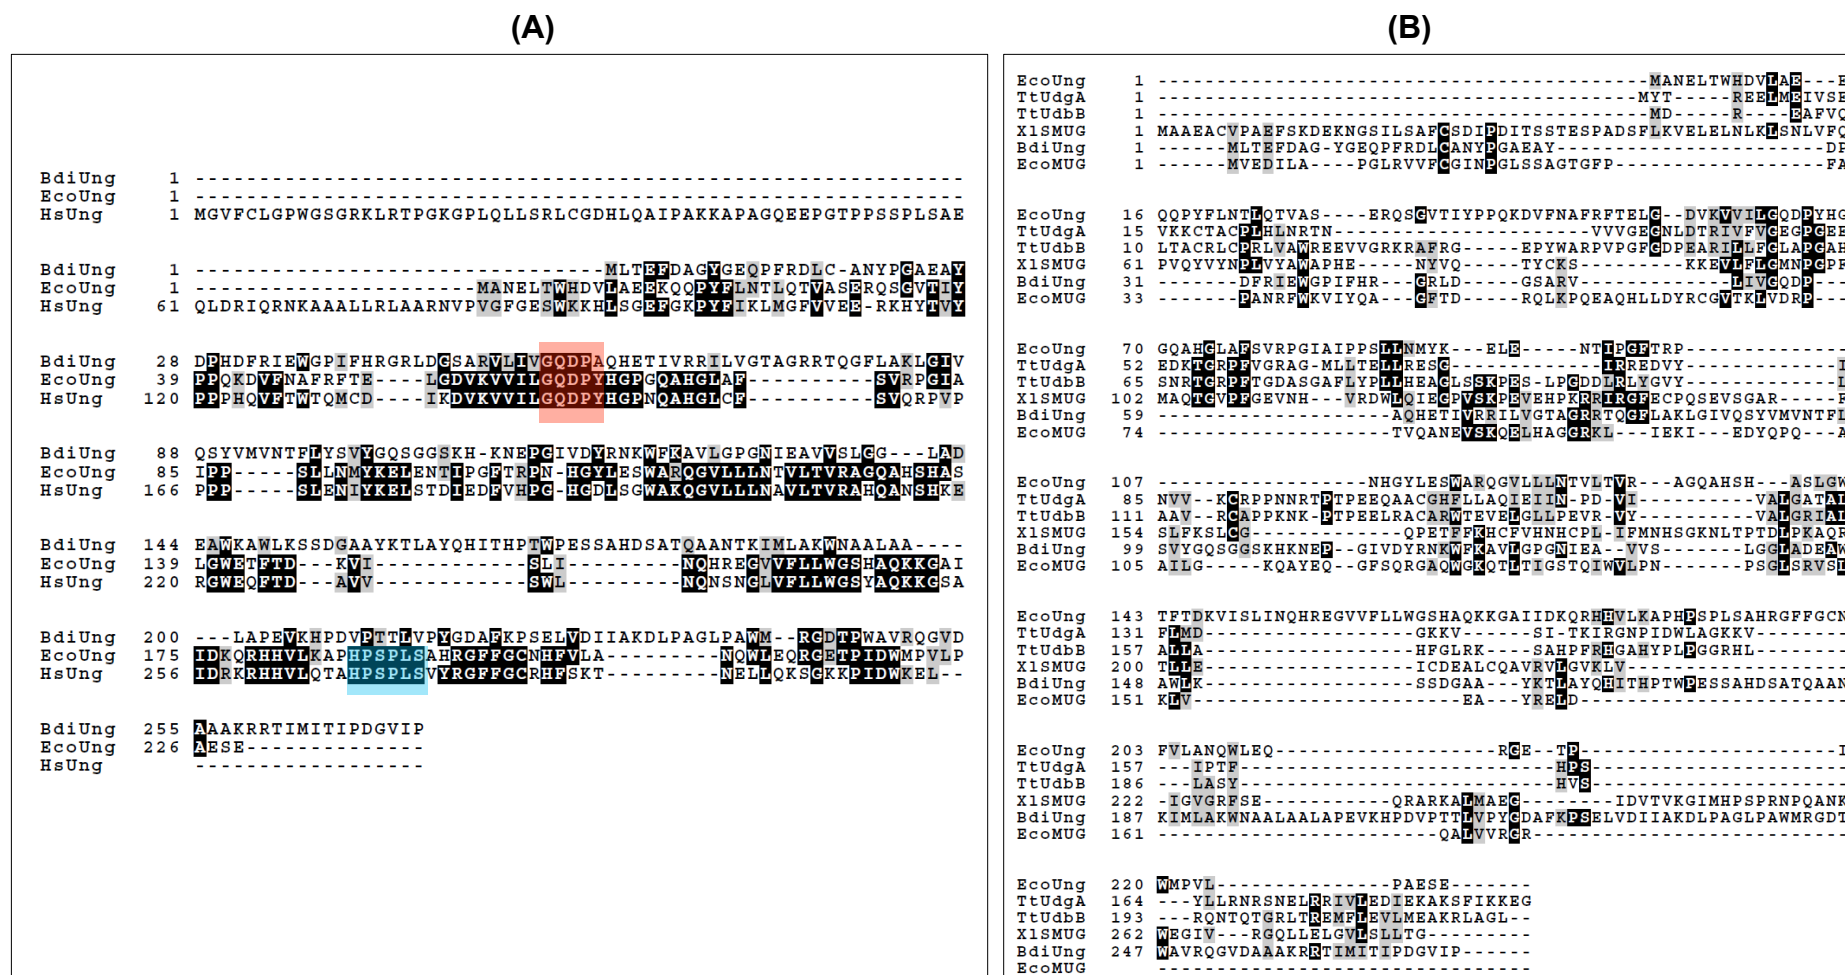

**Figure S2:** (A) Multiple sequence alignment of *BdiUng* with *EcoUng* and *HsUng* (family 1 UDGs from *E. coli* and *Homo sapiens*, respectively). Conserved regions corresponding to motif A (GQDPY) and motif B are highlighted in red and blue respectively. (B) Multiple sequence alignment of *BdiUng* with representative members from other families of UDGs – namely *EcoUng*, *EcoMUG*, *XlSMUG*, *TthUdgA* and *TthUdgB* belonging to families 1 to 5, respectively). Sequences were aligned using clustal omega and schematic representation was obtained by using BOXSHADE ([www.ch.embnet.org](http://www.ch.embnet.org)). Identical residues are shaded in black while similar residues in grey.

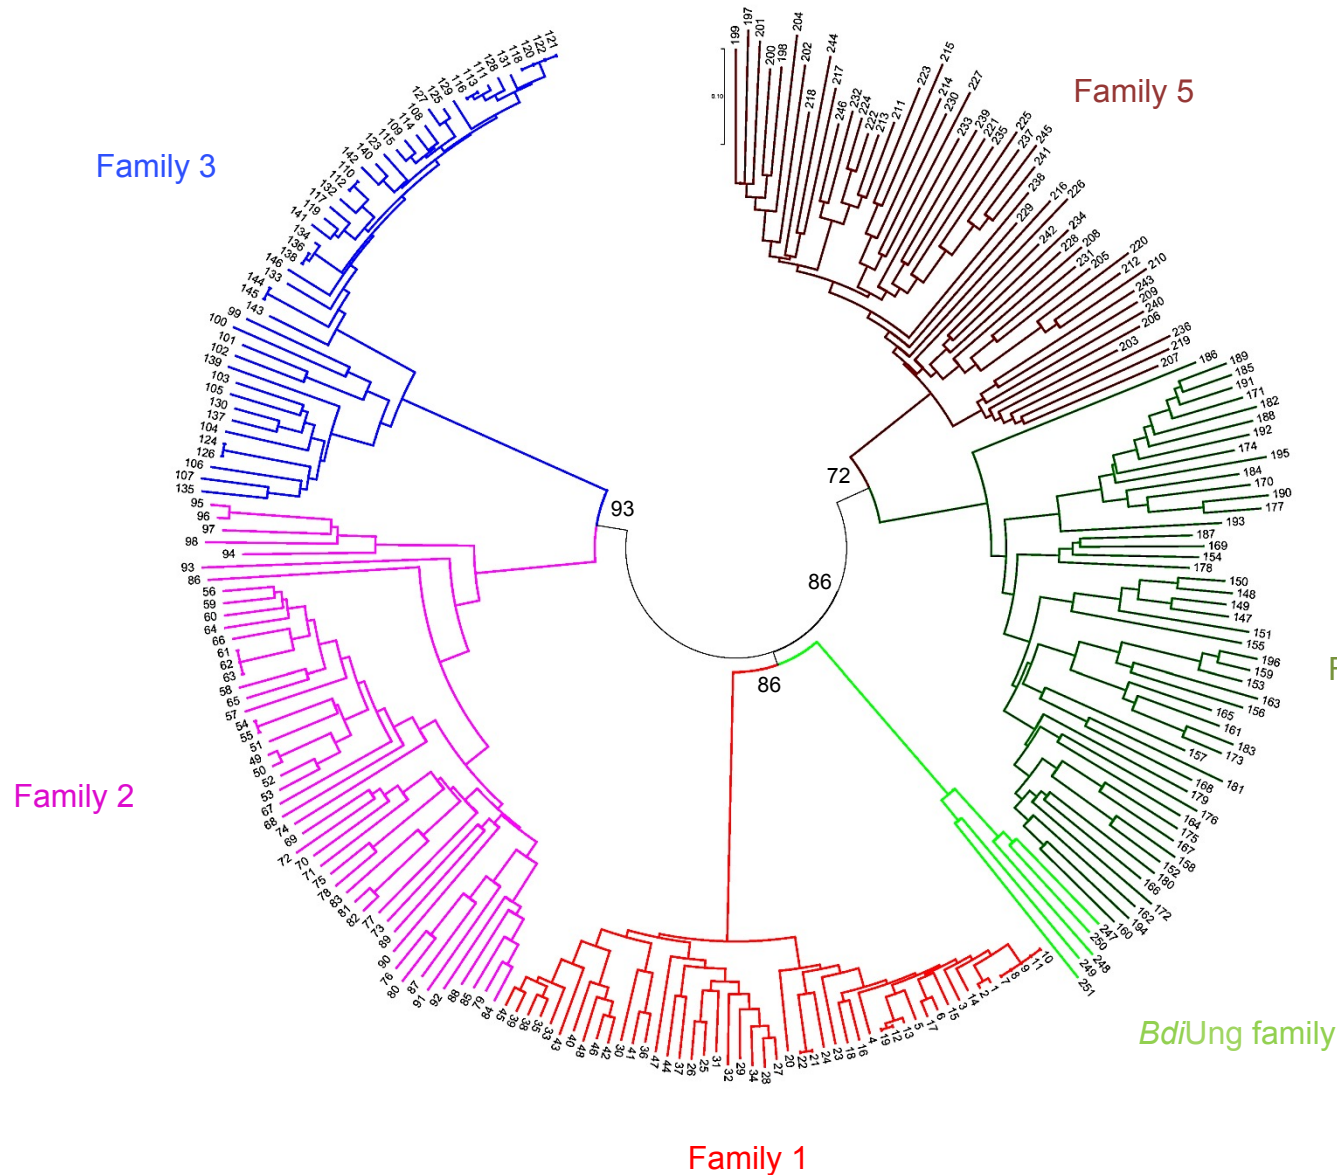

**Figure S3:** The evolutionary history was inferred using the Neighbor-Joining method (Saitou and Nei, 1978). The optimal tree with the sum of branch length = 27.05401915 is shown. The confidence probability (multiplied by 100) that the interior branch length is greater than 0, as estimated using the bootstrap test (1000 replicates) is shown next to the selected branches (Dopazo, 1992; Rzhetsky and Nei, 1992). The tree is drawn to scale, with branch lengths in the same units as those of the evolutionary distances used to infer the phylogenetic tree. The evolutionary distances were computed using the p-distance method (Nei and Kumar, 2000) and are in the units of the number of amino acid differences per site. The analysis involved 251 amino acid sequences. All positions containing gaps and missing data were eliminated. There were a total of 93 positions in the final dataset. Evolutionary analyses were conducted in MEGA7 (Kumar et. al., 2016). Details of protein sequences considered for constructing the tree are provided in Table S4.



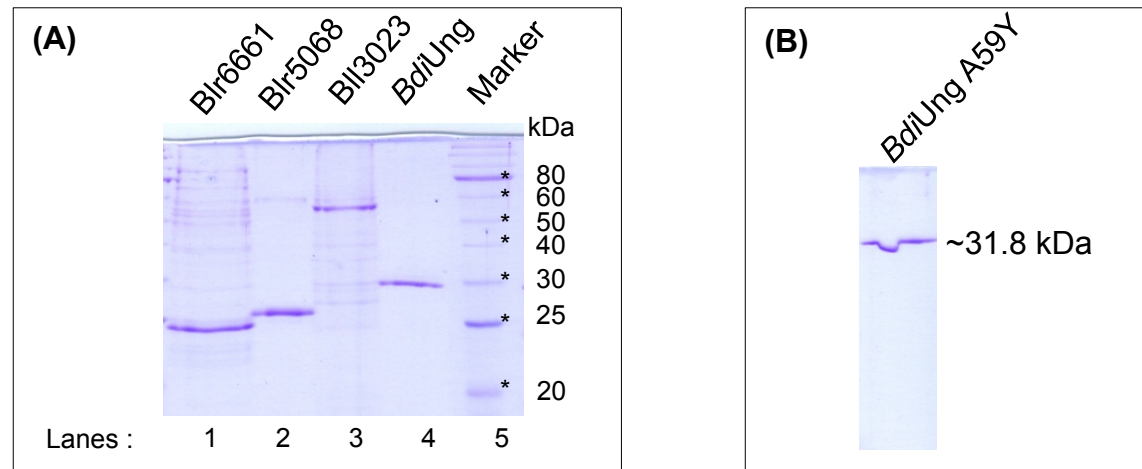

**Figure S4:** (A) Purified proteins (0.5  $\mu$ g) visualized on 15% SDS PAGE. Lanes: 1, Blr6661; 2, Blr5068; 3, Bll3023; 4, *BdiUng*; and 5, protein size markers. (B) Purified *BdiUngA59Y* mutant (1  $\mu$ g) analysed on 15% SDS PAGE.

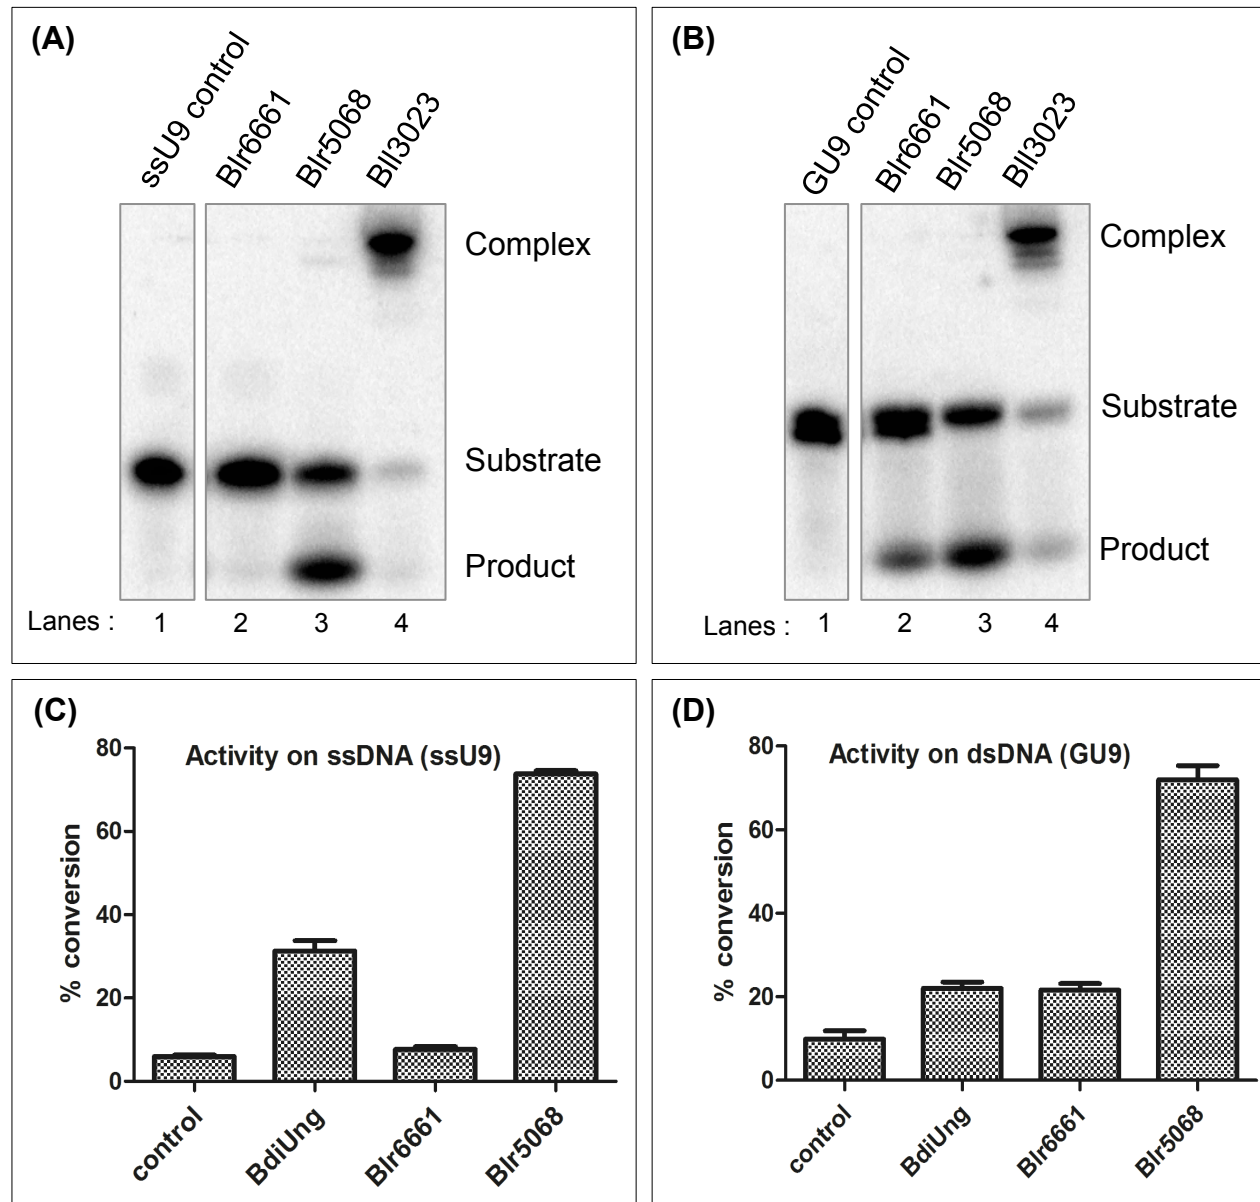

**Figure S5:** Uracil excision assays with different UDGs (100 ng each) identified from *B. diazoefficiens* on (A) ssU9 and (B) GU9. Products of excision assay were resolved on 8 M urea PAGE (15%). (C) and (D) show estimated % conversions as a mean of three independent assays with standard deviations for ssU9 (with 100 ng protein) and GU9 (with 500 ng protein), respectively in comparison to *BdiUng* activity. Note: Bll3023 is an ortholog of UdgX from *M. smegmatis* published earlier (Sang, P.B., Srinath, T., Patil, A.G., Woo, E.J. and Varshney, U., 2015, A unique uracil-DNA binding protein of the uracil DNA glycosylase superfamily. *Nucleic Acids Research*, **43**, 8452-8463 )

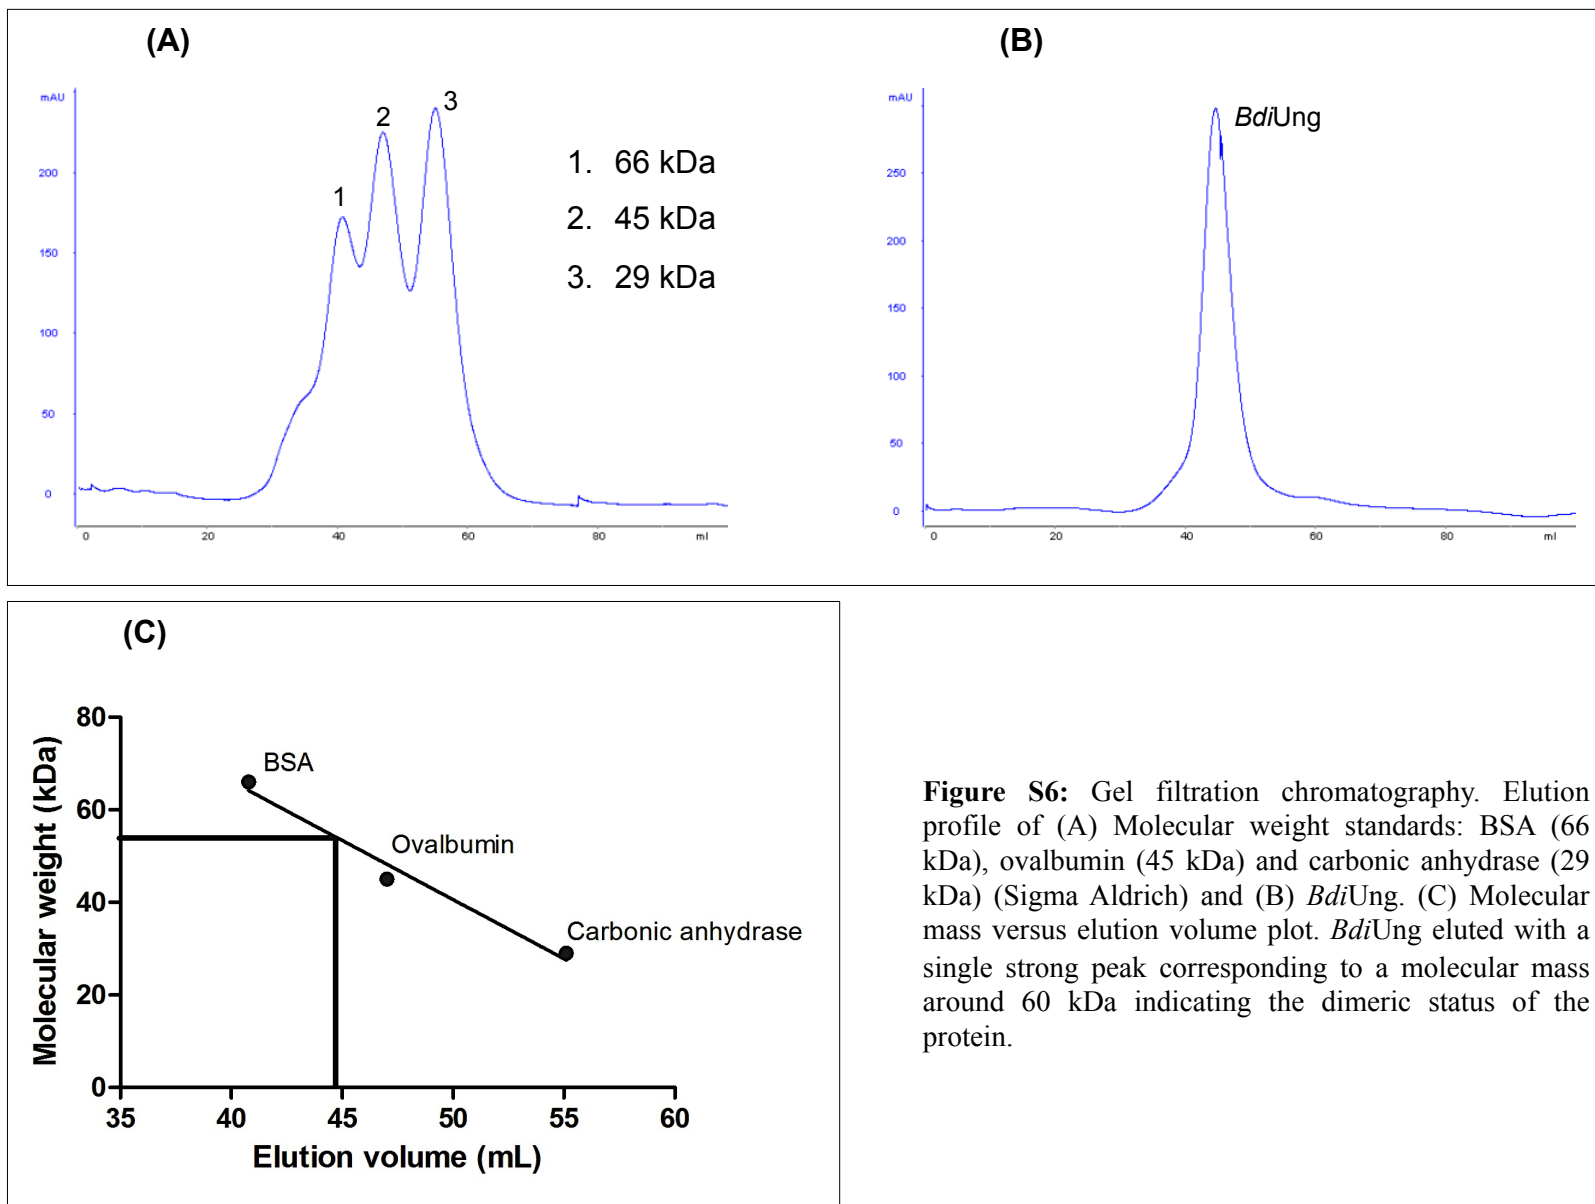

**Figure S6:** Gel filtration chromatography. Elution profile of (A) Molecular weight standards: BSA (66 kDa), ovalbumin (45 kDa) and carbonic anhydrase (29 kDa) (Sigma Aldrich) and (B) *BdiUng*. (C) Molecular mass versus elution volume plot. *BdiUng* eluted with a single strong peak corresponding to a molecular mass around 60 kDa indicating the dimeric status of the protein.

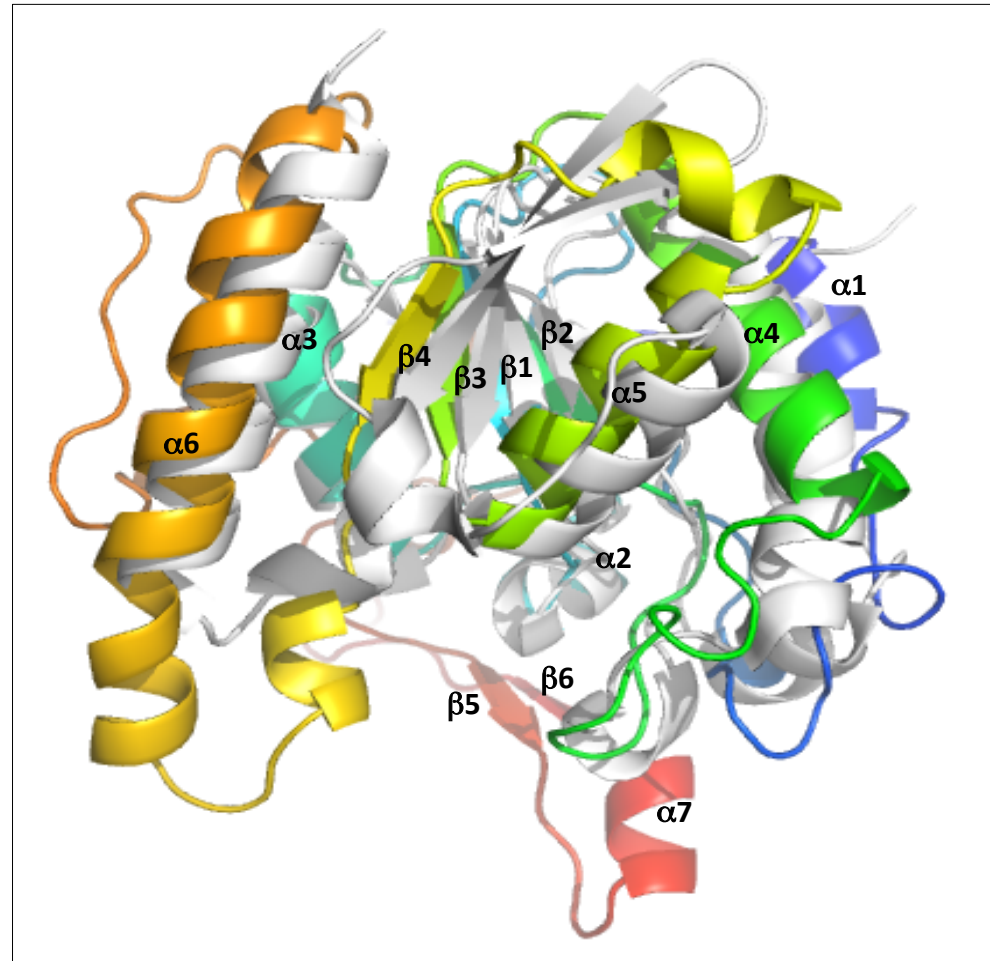

**Figure S7:** Overlap of *BdiUng* and uracil-DNA glycosylase from *Sulfolobus tokodaii* (PDB ID 4ZBZ) showing common  $\alpha/\beta/\alpha$  sandwich fold of UDG family 4 without [4Fe-S] cluster.

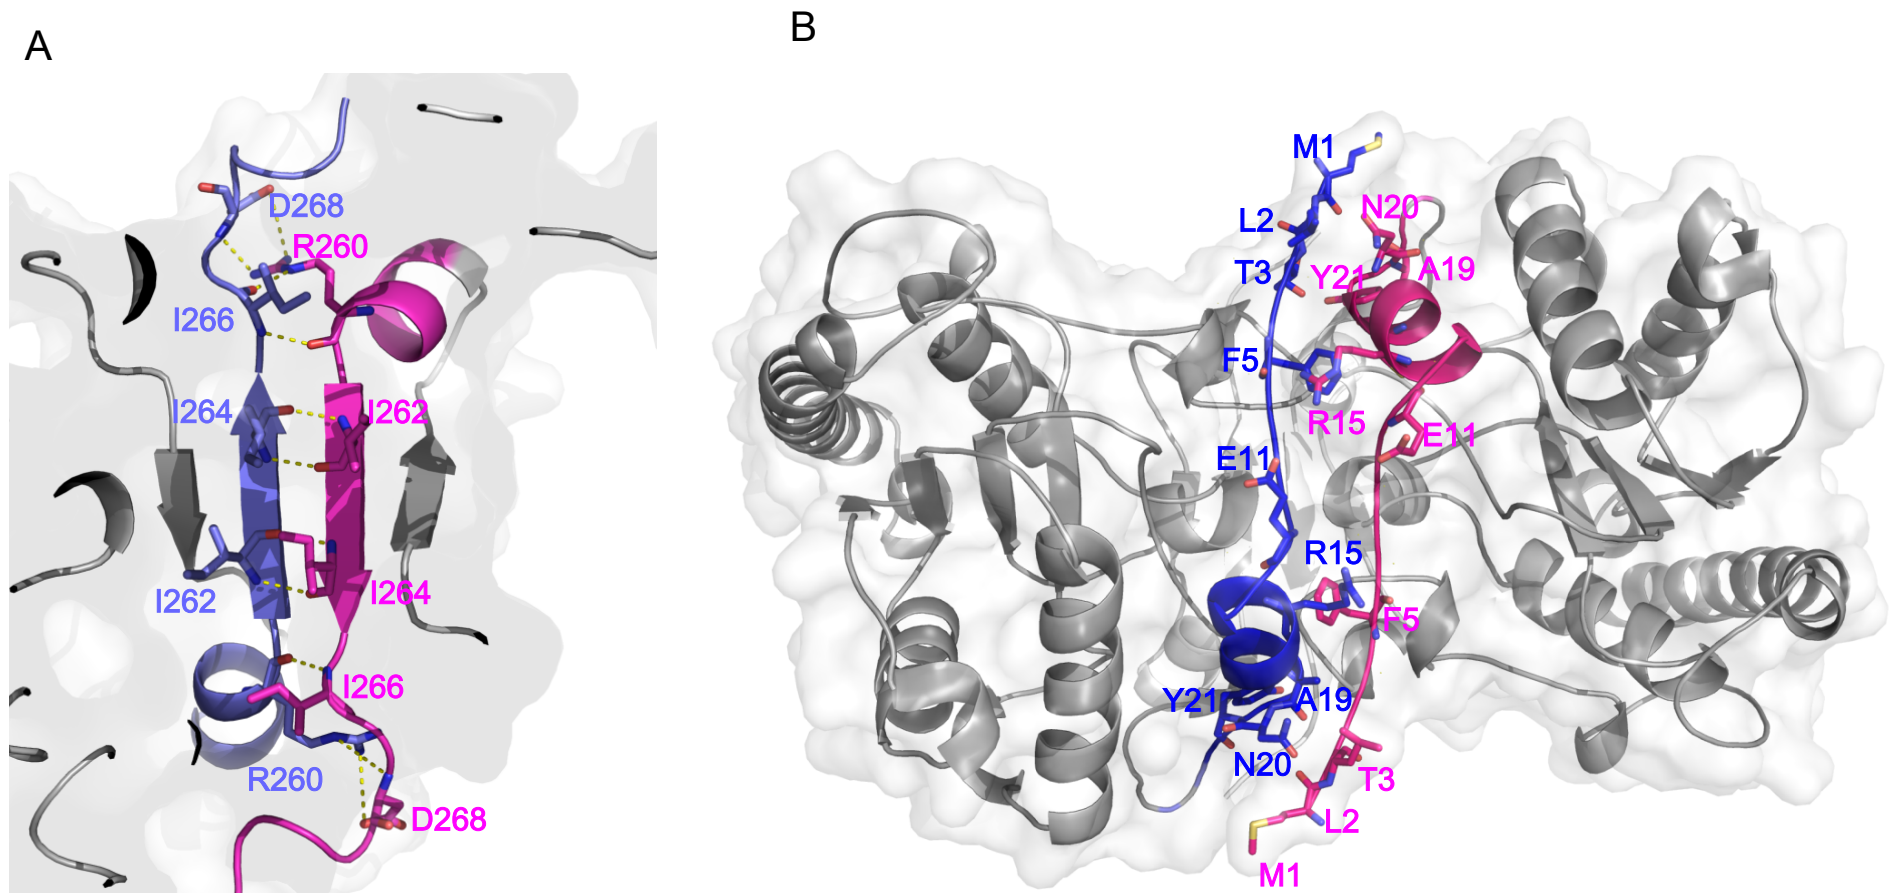

**Figure S8:** The dimer interface of *BdiUng*. (A) The interactions (yellow dash lines) between the residues in C-terminal tail extensions of each monomer involved in dimer formation. (B) The interactions between the N-terminal residues of monomers involved in dimer formation.

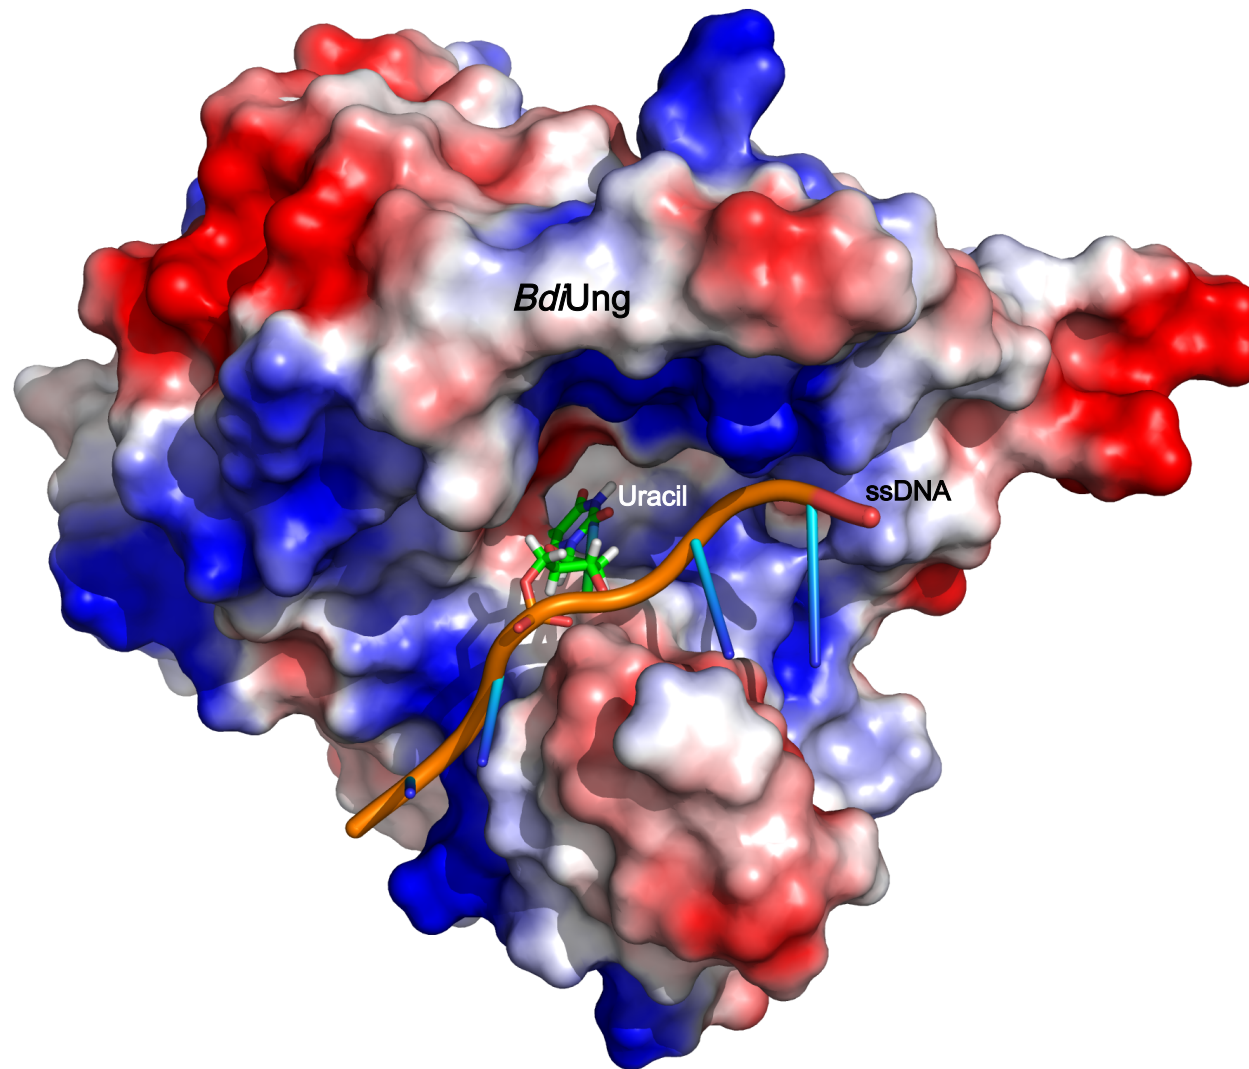

**Figure S9:** The DNA binding surface of *BdiUng*. The model of ssDNA bound *BdiUng* with an electrostatic charge distribution on the surface (Blue represents positive charge and negative charge is represented by red color)

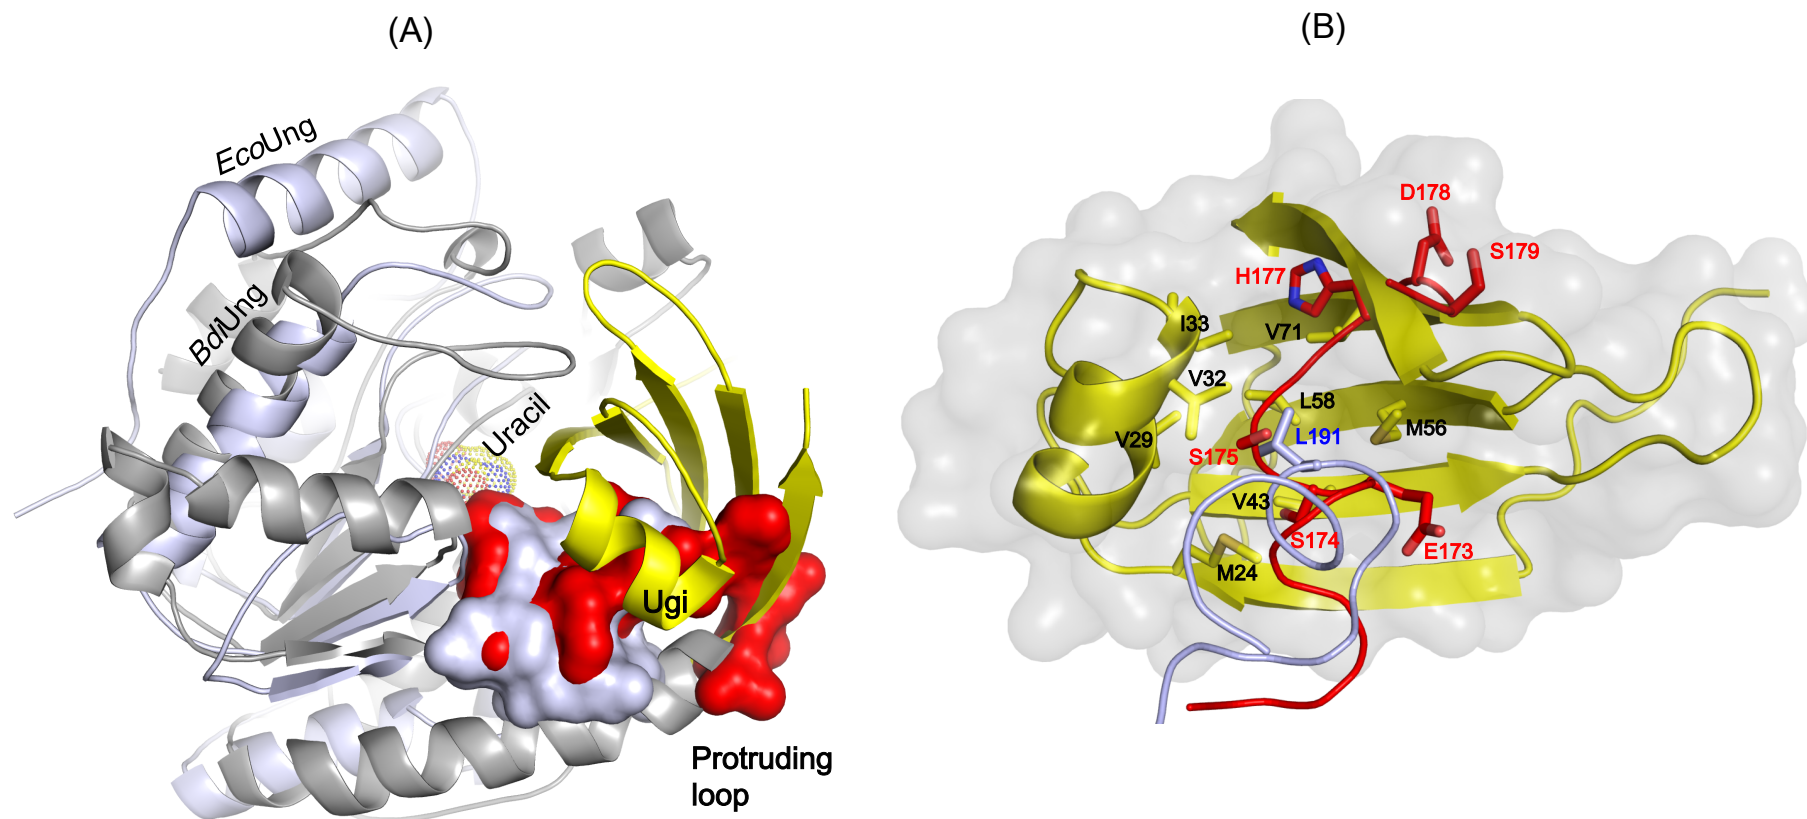

**Figure S10:** The protruding loop makes *BdiUng* resistant to Ugi. (A) The overlap of *BdiUng* (grey cartoon) and *E. coli* Ung (pale blue cartoon)-Ugi (yellow) complex. The protruding loop of *BdiUng* is shown as red while corresponding region in *E. coli* is shown as pale blue surface diagram. (B) The detailed overview of the overlap of protruding loop of *BdiUng* (red) and corresponding region of *E. coli* Ung (pale blue)-Ugi (yellow) complex. The L191 of *E. coli* Ung interacts with hydrophobic residues (shown as yellow sticks M24, V29, V32, I33, V43, M56, L58 and V71) of Ugi. The corresponding residues of *BdiUng* have been shown as red sticks.

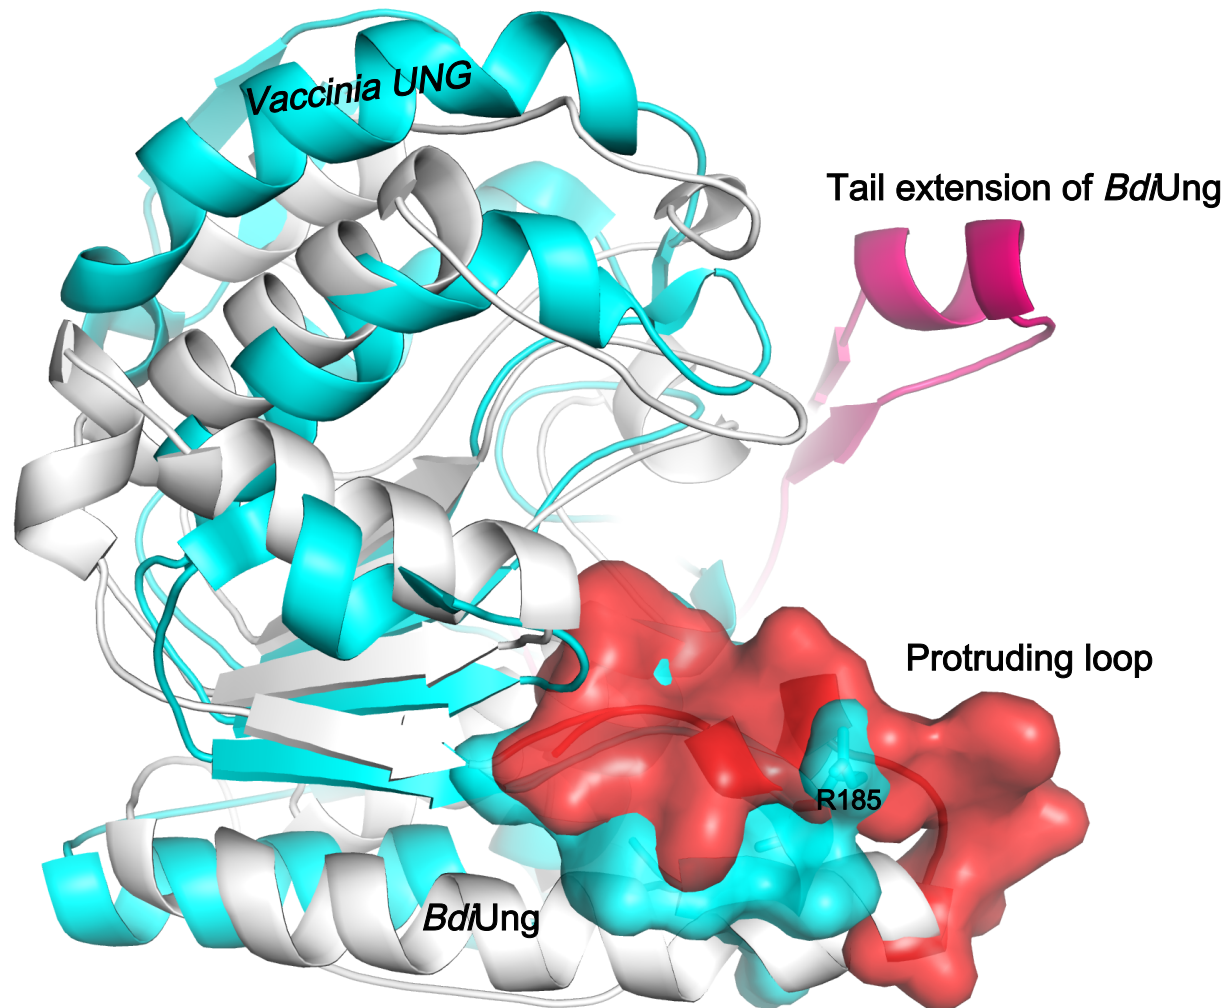

**Figure S11:** Comparison of unique features of *BdiUng* and vaccinia virus UNG. (A) The overlap of *BdiUng* (grey) with vaccinia virus UNG (Vaccinia UNG, cyan). The protruding loop is shown as red surface while corresponding region in vaccinia UNG as cyan surface with arginine represented as a stick. The tail extension of *BdiUng* is shown as magenta.



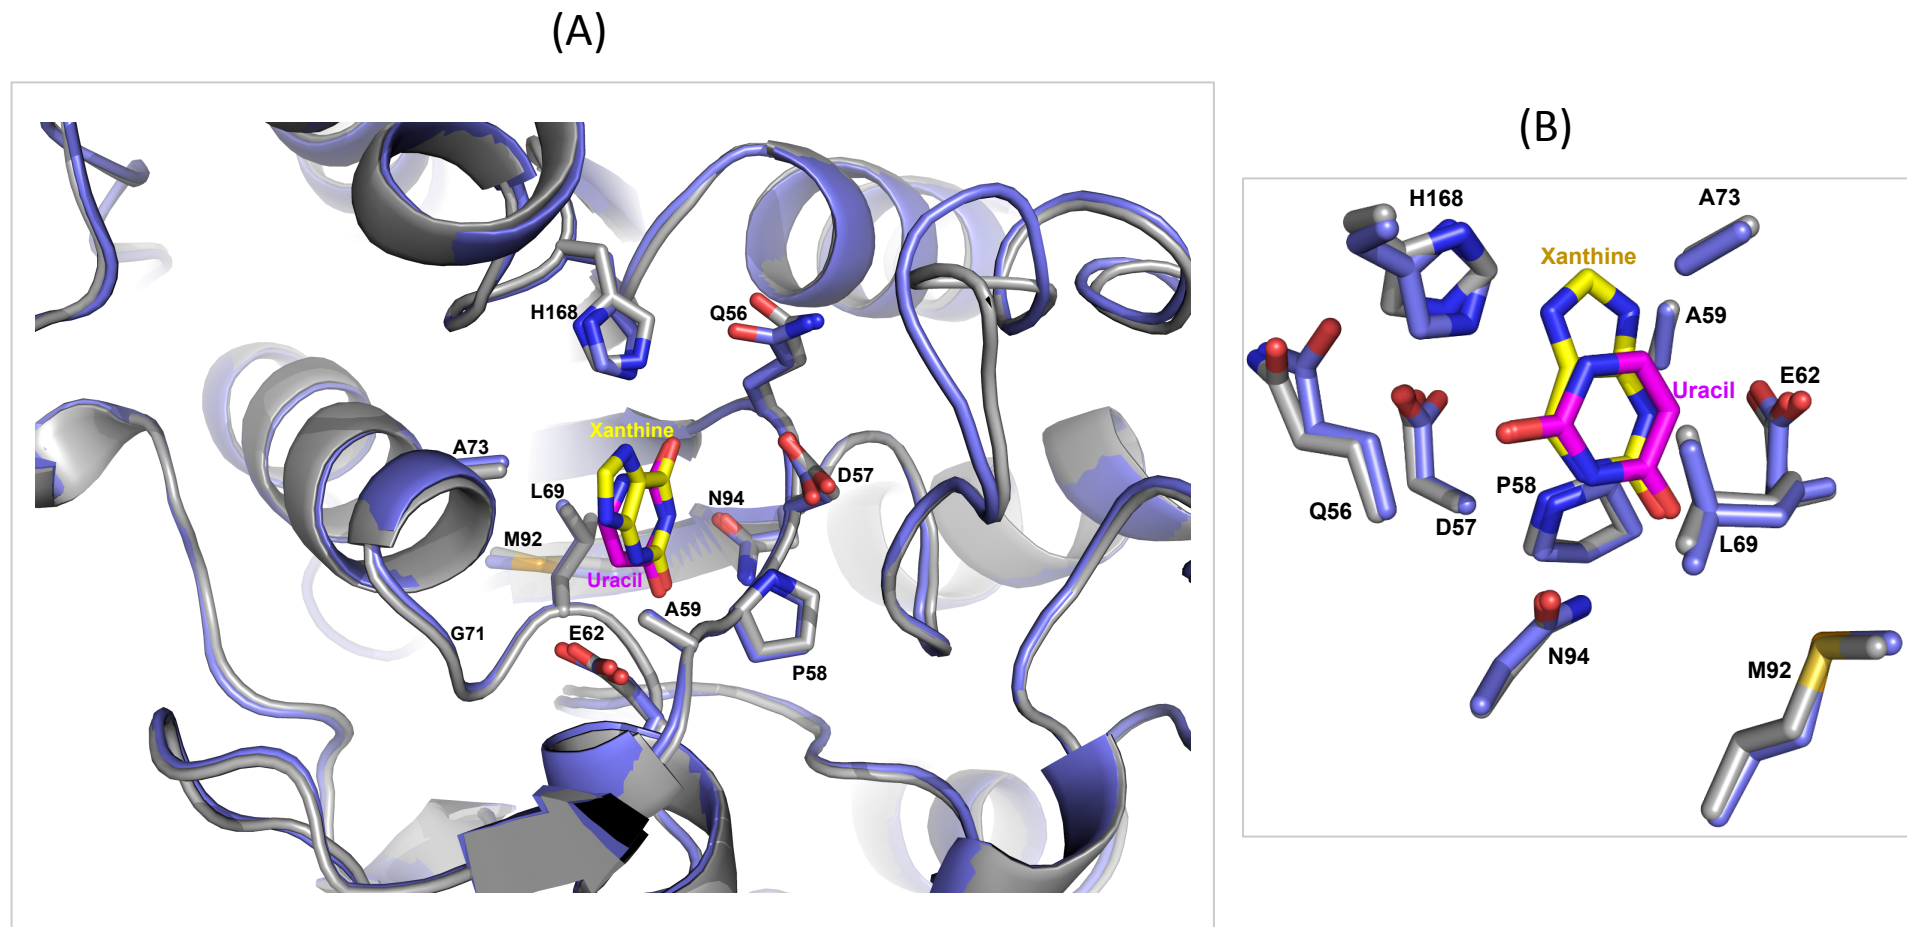

**Figure S12:** The larger cavity of active site of *BdiUng* is capable of accommodating diverse substrates. (A) An Overlap of *BdiUng* bound to xanthine (yellow) and uracil (magenta). The residues in active sites of *BdiUng*-Xanthine and *BdiUng*-Uracil complex are shown as sticks in grey and blue colours, respectively. (B) The detailed structure of active site of *BdiUng*-Xanthine and *BdiUng*-Uracil complex. Critical residues are shown as sticks in grey and blue colours respectively

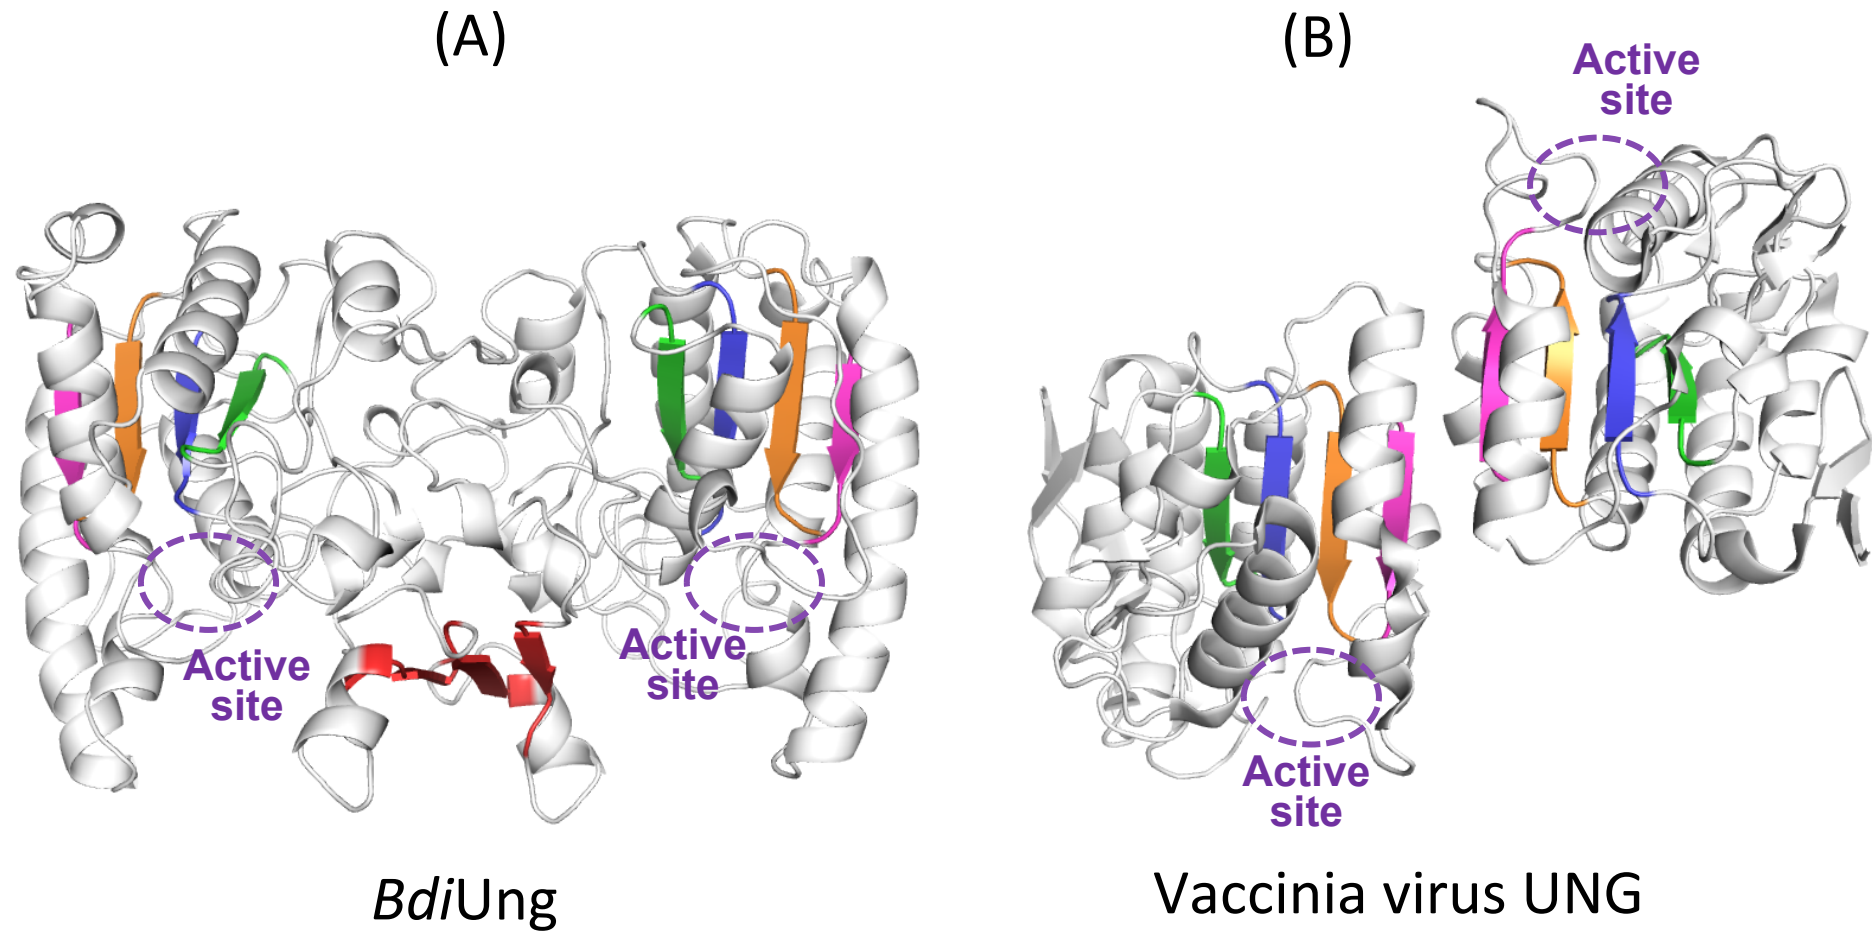

**Figure S13:** The structures of *BdiUng* (A) and vaccinia virus UNG (PDB ID 5JX3, B) are compared to highlight the different dimeric interfaces. The core  $\beta$ -strands of the main  $\alpha/\beta/\alpha$  sandwich folds in each monomer are colored blue, green, orange and pink in spectrum from N- to C-terminal. The additional  $\beta$ -sheet formed by dimerization in *BdiUng* is colored red. The active site pockets are depicted by dotted circles.
